# Supplementary material for: Development of novel antipsychotic agents by inhibiting dopamine transporter –in silicoapproach
Source: Royal Society of Chemistry journal article supplement (doi:10.1039/d1nj04759k), 2022-01-01
Supplement: d1nj04759k1.pdf [file d1nj04759k1.pdf]

## Supplementary Material

Development of novel antipsychotic agents by inhibiting dopamine transporter – comprehensive  
in silico approach

Vladimir Đorđević, Srđan Pešić, Jelena Živković, Goran M. Nikolić, Aleksandar M.  
Veselinović\*

### Table of content

|                   |    |
|-------------------|----|
| Table S1.....     | 1  |
| Table S2.....     | 3  |
| Table S3.....     | 4  |
| Figure S1-S3..... | 5  |
| Table S3.....     | 8  |
| Table S4.....     | 12 |
| Figure S4-S9..... | 14 |

\*Corresponding author:

Aleksandar M. Veselinović,

Faculty of Medicine, Department of Chemistry, University of Niš,

Bulevar Dr Zorana Đinđića 81, 18000 Niš, Serbia

Fax: +381 18 4238770; Phone: +381 18 4570029; E-mail: [aveselinovic@medfak.ni.ac.rs](mailto:aveselinovic@medfak.ni.ac.rs)

Table S1. The SMILES notation of the studied molecules, calculated values for the DCW, experimental data (Ac) – expr, the values of Ac calculated with the application of CORAL software – calc, the difference between expr and calc – diff for the built QSPR model

|    | CHEMBL ID    | SMILES notation                                              | Exp.  | Split 1  |        |         |     | Split 2  |        |         |     | Split 3  |        |         |     |
|----|--------------|--------------------------------------------------------------|-------|----------|--------|---------|-----|----------|--------|---------|-----|----------|--------|---------|-----|
|    |              |                                                              |       | DCW      | Calc.  | Diff    | Set | DCW      | Calc.  | Diff    | Set | DCW      | Calc.  | Diff    | Set |
| 1  | CHEMBL59103  | <chem>c1ccc(cc1)C1CCN(CC1)Cc1c[nH]e2c1cccc2</chem>           | 7.602 | 58.51804 | 7.4872 | 0.1148  | Tr  | 89.68157 | 7.5207 | 0.0813  | Tr  | 63.5441  | 7.3303 | 0.2717  | Tr  |
| 2  | CHEMBL57478  | <chem>CC1CCN(CC1)Cc1c[nH]e2c1cccc2</chem>                    | 6.244 | 39.89871 | 6.4623 | -0.2183 | Tr  | 69.16393 | 6.1929 | 0.0511  | Tr  | 53.55339 | 6.5624 | -0.3184 | Tr  |
| 3  | CHEMBL59324  | <chem>c1ccc(cc1)N1CCN(CC1)Cc1c[nH]e2c1cccc2</chem>           | 8.097 | 66.02025 | 7.9001 | 0.1969  | Tr  | 96.95687 | 7.9915 | 0.1055  | Tr  | 72.02765 | 7.9824 | 0.1146  | Tr  |
| 4  | CHEMBL58296  | <chem>Clc1ccc(cc1)CN1CCC(CC1)c1noc(c1)c1ccc(cc1)Cl</chem>    | 7.357 | 64.79921 | 7.8329 | -0.4759 | Ts  | 92.18446 | 7.6827 | -0.3257 | Ts  | 64.08256 | 7.3717 | -0.0147 | Tr  |
| 5  | CHEMBL60815  | <chem>c1ccc(cc1)N1CCN(CC1)Cc1[nH]cc(c1)c1cccc1</chem>        | 7.921 | 74.28323 | 8.355  | -0.434  | Tr  | 102.0615 | 8.3219 | -0.4009 | Ts  | 75.4458  | 8.2452 | -0.3242 | Tr  |
| 6  | CHEMBL60518  | <chem>Ic1ccc(cc1)N1CCN(CC1)Cc1c[nH]e2c1cccn2</chem>          | 9.292 | 92.15413 | 9.3386 | -0.0466 | Tr  | 109.6511 | 8.813  | 0.479   | Tr  | 86.44275 | 9.0904 | 0.2016  | Tr  |
| 7  | CHEMBL61080  | <chem>Clc1ccc(cc1)CN1CCC(CC1)c1n[nH]c(c1)c1ccc(cc1)Cl</chem> | 7.215 | 66.09157 | 7.904  | -0.689  | Ts  | 90.99112 | 7.6054 | -0.3904 | Tr  | 66.87735 | 7.5865 | -0.3715 | Tr  |
| 8  | CHEMBL61079  | <chem>Clc1ccc(cc1)c1[nH]nc(c1C)C1CCN(CC1)CCc1cccc1</chem>    | 8.921 | 72.136   | 8.2368 | 0.6842  | Ts  | 105.4192 | 8.5392 | 0.3818  | Tr  | 82.20996 | 8.7651 | 0.1559  | Tr  |
| 9  | CHEMBL61195  | <chem>Clc1ccc(cc1)CN1CCC(CC1)c1onc(c1)c1ccc(cc1)Cl</chem>    | 8.444 | 72.24857 | 8.243  | 0.201   | Tr  | 95.27375 | 7.8826 | 0.5614  | Tr  | 67.55574 | 7.6387 | 0.8053  | Tr  |
| 10 | CHEMBL80411  | <chem>CN(C1=Ne2c(OC1)cccc2)CCCCN1CCN(CC1)c1ncccn1</chem>     | 6.253 | 46.48516 | 6.8248 | -0.5718 | Ts  | 69.66235 | 6.2252 | 0.0278  | Ts  | 48.17423 | 6.1489 | 0.1041  | Ts  |
| 11 | CHEMBL80655  | <chem>c1cnc(nc1)N1CCN(CC1)CCCN=C1COc2c(N1)cccc2</chem>       | 6.971 | 52.41001 | 7.151  | -0.18   | Tr  | 88.5796  | 7.4494 | -0.4784 | Tr  | 61.93618 | 7.2067 | -0.2357 | Tr  |
| 12 | CHEMBL80645  | <chem>C(CCN1CCN(CC1)c1ncccn1)CCN=C1COc2c(N1)cccc2</chem>     | 7.721 | 60.70983 | 7.6078 | 0.1132  | Tr  | 92.88947 | 7.7283 | -0.0073 | Ts  | 66.27382 | 7.5401 | 0.1809  | Tr  |
| 13 | CHEMBL80627  | <chem>C(CCN1CCN(CC1)c1cccn1)CCN=C1COc2c(N1)cccc2</chem>      | 7.301 | 59.69728 | 7.5521 | -0.2511 | Tr  | 96.22169 | 7.9439 | -0.6429 | Tr  | 64.98704 | 7.4412 | -0.1402 | Tr  |
| 14 | CHEMBL80711  | <chem>COc1cccc1N1CCN(CC1)CCCN=C1COc2c(N1)cccc2</chem>        | 8.523 | 72.86508 | 8.2769 | 0.2461  | Tr  | 84.20015 | 7.166  | 1.357   | Tr  | 71.67426 | 7.9553 | 0.5677  | Ts  |
| 15 | CHEMBL88289  | <chem>FC(c1nc2c([nH]1)c(ccc2)N1CCN(CC1)Cc1cccc1)(F)F</chem>  | 8.538 | 77.41586 | 8.5274 | 0.0106  | Tr  | 97.6342  | 8.0354 | 0.5026  | Ts  | 83.50093 | 8.8643 | -0.3263 | Tr  |
| 16 | CHEMBL88837  | <chem>c1ccc(cc1)CN1CCN(CC1)c1cccc2c1[nH]en2</chem>           | 7.328 | 66.54151 | 7.9288 | -0.6008 | Ts  | 90.10007 | 7.5478 | -0.2198 | Tr  | 66.80635 | 7.5811 | -0.2531 | Tr  |
| 17 | CHEMBL90476  | <chem>Brc1ccc(c2c1[nH]cc2)N1CCN(CC1)Cc1cccc1</chem>          | 8.585 | 75.07204 | 8.3984 | 0.1866  | Tr  | 106.6664 | 8.6199 | -0.0349 | Tr  | 73.02764 | 8.0593 | 0.5257  | Ts  |
| 18 | CHEMBL99967  | <chem>c1ccc(nc1)N1CCN(CC1)Cc1enc([nH]1)c1cccc1</chem>        | 8.071 | 70.94941 | 8.1714 | -0.1004 | Tr  | 108.3218 | 8.727  | -0.656  | Tr  | 77.64778 | 8.4144 | -0.3434 | Ts  |
| 19 | CHEMBL103772 | <chem>c1ccc(cc1)c1ncc([nH]1)CN1CCN(CC1)c1ncccn1</chem>       | 8.42  | 72.52936 | 8.2584 | 0.1616  | Tr  | 93.46717 | 7.7657 | 0.6543  | Tr  | 70.03573 | 7.8293 | 0.5907  | Ts  |
| 20 | CHEMBL103871 | <chem>c1ccc(cc1)N1CCN(CC1)Cc1enc([nH]1)c1cccc1</chem>        | 8.284 | 75.41584 | 8.4173 | -0.1333 | Tr  | 106.2961 | 8.5959 | -0.3119 | Ts  | 75.82994 | 8.2747 | 0.0093  | Tr  |
| 21 | CHEMBL53     | <chem>CN1CCc2c3C1Cc1ccc(c1c3ccc2)O)O</chem>                  | 8.051 | 66.54681 | 7.9291 | 0.1219  | Tr  | 97.83491 | 8.0483 | 0.0027  | Tr  | 71.07302 | 7.909  | 0.142   | Tr  |
| 22 | CHEMBL108463 | <chem>c1ccc(cc1)C1=CCN(CC1)CCC#Cc1cccn1</chem>               | 6.17  | 40.11565 | 6.4742 | -0.3042 | Ts  | 71.46387 | 6.3418 | -0.1718 | Tr  | 45.94245 | 5.9774 | 0.1926  | Ts  |

|    |              |                                                                  |       |          |        |         |    |          |        |         |    |          |        |         |    |
|----|--------------|------------------------------------------------------------------|-------|----------|--------|---------|----|----------|--------|---------|----|----------|--------|---------|----|
| 23 | CHEMBL108531 | <chem>Nc1ccc(cc1)C#CCCN1CCC(=CC1)c1ccccc1</chem>                 | 6.64  | 39.71184 | 6.452  | 0.188   | Tr | 73.21589 | 6.4551 | 0.1849  | Ts | 52.52728 | 6.4835 | 0.1565  | Tr |
| 24 | CHEMBL109063 | <chem>N=c1ccc(c[nH]1)C#CCCN1CCC(=CC1)c1ccccc1</chem>             | 6.56  | 40.90899 | 6.5179 | 0.0421  | Tr | 69.92829 | 6.2424 | 0.3176  | Tr | 52.2023  | 6.4585 | 0.1015  | Tr |
| 25 | CHEMBL109101 | <chem>Nc1ccc(nc1)C#CCCN1CCC(=CC1)c1ccccc1</chem>                 | 6.43  | 37.53353 | 6.3321 | 0.0979  | Tr | 73.37154 | 6.4652 | -0.0352 | Tr | 55.36775 | 6.7018 | -0.2718 | Tr |
| 26 | CHEMBL110489 | <chem>c1ccc(cc1)C1=CCN(CC1)CCC#Cc1ccccc1</chem>                  | 6.24  | 37.6586  | 6.339  | -0.099  | Tr | 66.48174 | 6.0193 | 0.2207  | Ts | 47.02242 | 6.0604 | 0.1796  | Tr |
| 27 | CHEMBL125916 | <chem>COc1ccccc1N1CCN(CC1)CCCN=C(c1cc2c([nH]1)ccccc2)O</chem>    | 6.322 | 50.01826 | 7.0193 | -0.6973 | Ts | 82.57925 | 7.0611 | -0.7391 | Tr | 50.64663 | 6.339  | -0.017  | Tr |
| 28 | CHEMBL128232 | <chem>Cc1ccccc1OCCNCCCOc1ccccc1</chem>                           | 9.34  | 89.10051 | 9.1706 | 0.1694  | Tr | 117.3888 | 9.3138 | 0.0262  | Tr | 92.76003 | 9.576  | -0.236  | Tr |
| 29 | CHEMBL128222 | <chem>C1c1ccc(cc1)OCCNCCCOc1ccc(cc1)Br</chem>                    | 7.42  | 68.22994 | 8.0218 | -0.6018 | Ts | 93.11856 | 7.7431 | -0.3231 | Tr | 69.49997 | 7.7881 | -0.3681 | Tr |
| 30 | CHEMBL129534 | <chem>C1c1ccc(cc1)OCCNCCCOc1ccccc1</chem>                        | 9.51  | 87.66361 | 9.0915 | 0.4185  | Tr | 118.0714 | 9.3579 | 0.1521  | Tr | 84.67621 | 8.9547 | 0.5553  | Tr |
| 31 | CHEMBL128647 | <chem>Cc1ccc(cc1)OCCNCCCOc1ccccc1</chem>                         | 9.28  | 86.6803  | 9.0373 | 0.2427  | Tr | 111.2546 | 8.9168 | 0.3632  | Tr | 84.71431 | 8.9576 | 0.3224  | Tr |
| 32 | CHEMBL128524 | <chem>C(CCOc1ccccc1)NCCOc1ccccc1</chem>                          | 8.699 | 86.92222 | 9.0507 | -0.3517 | Tr | 113.7024 | 9.0752 | -0.3762 | Ts | 88.07767 | 9.2161 | -0.5171 | Tr |
| 33 | CHEMBL130370 | <chem>Cc1ccc(cc1)OCCNCCCOc1ccc(cc1)C</chem>                      | 7.96  | 80.31323 | 8.6869 | -0.7269 | Tr | 106.7032 | 8.6222 | -0.6622 | Tr | 72.43938 | 8.0141 | -0.0541 | Tr |
| 34 | CHEMBL129757 | <chem>Fe1ccc(cc1)OCCNCCCOc1ccc(cc1)Cl</chem>                     | 9.08  | 81.88274 | 8.7733 | 0.3067  | Tr | 106.6417 | 8.6183 | 0.4617  | Tr | 76.64771 | 8.3375 | 0.7425  | Tr |
| 35 | CHEMBL129927 | <chem>Cc1cc(OCCNCCCOc2ccccc2)ccc1C</chem>                        | 9.46  | 93.32111 | 9.4029 | 0.0571  | Tr | 118.8424 | 9.4078 | 0.0522  | Tr | 91.74731 | 9.4982 | -0.0382 | Ts |
| 36 | CHEMBL131299 | <chem>Cc1ccc(cc1)OCCNCCCOc1ccccc1</chem>                         | 8.57  | 86.6803  | 9.0373 | -0.4673 | Tr | 111.2546 | 8.9168 | -0.3468 | Tr | 84.71431 | 8.9576 | -0.3876 | Tr |
| 37 | CHEMBL131396 | <chem>C1c1ccccc1OCCNCCCOc1ccccc1</chem>                          | 8.36  | 85.58591 | 8.9771 | -0.6171 | Ts | 106.0592 | 8.5806 | -0.2206 | Ts | 83.03642 | 8.8286 | -0.4686 | Ts |
| 38 | CHEMBL131484 | <chem>Cc1ccc(cc1)OCCNCCCOc1ccc(cc1)Cl</chem>                     | 8.25  | 76.88779 | 8.4983 | -0.2483 | Tr | 101.7987 | 8.3049 | -0.0549 | Tr | 79.73868 | 8.5751 | -0.3251 | Ts |
| 39 | CHEMBL131997 | <chem>C1c1cc(OCCNCCCOc2ccccc2)ccc1C</chem>                       | 9.28  | 89.67885 | 9.2024 | 0.0776  | Tr | 117.11   | 9.2957 | -0.0157 | Tr | 88.41842 | 9.2423 | 0.0377  | Tr |
| 40 | CHEMBL140594 | <chem>N#Cc1ccc2c(c1)cc([nH]2)CN1CCN(CC1)c1ccc(cc1)Cl</chem>      | 8.678 | 77.07987 | 8.5089 | 0.1691  | Tr | 107.6666 | 8.6846 | -0.0066 | Ts | 85.71794 | 9.0347 | -0.3567 | Ts |
| 41 | CHEMBL140165 | <chem>N#Cc1ccc2c(c1)c(c[nH]2)CN1CCN(CC1)c1ccc(cc1)F</chem>       | 6.959 | 62.80985 | 7.7234 | -0.7644 | Ts | 86.07992 | 7.2876 | -0.3286 | Tr | 60.42443 | 7.0905 | -0.1315 | Tr |
| 42 | CHEMBL140258 | <chem>N#Cc1ccc2c(c1)[nH]c(c2)CN1CCN(CC1)c1ccccc1Cl</chem>        | 8.469 | 76.62628 | 8.4839 | -0.0149 | Tr | 106.8804 | 8.6337 | -0.1647 | Tr | 78.60047 | 8.4876 | -0.0186 | Tr |
| 43 | CHEMBL141035 | <chem>N#Cc1ccc2c(c1)cc([nH]2)CN1CCN(CC1)c1ccccc1Cl</chem>        | 8.854 | 81.45529 | 8.7497 | 0.1043  | Tr | 108.1881 | 8.7183 | 0.1357  | Tr | 83.24533 | 8.8447 | 0.0093  | Tr |
| 44 | CHEMBL243225 | <chem>CCOc1ccccc1N1CCN(CC1)CCCC1ON=C(C1)c1ccc(c(c1)OC)OC~</chem> | 6.648 | 42.44611 | 6.6025 | 0.0455  | Tr | 74.93439 | 6.5663 | 0.0817  | Tr | 56.90235 | 6.8198 | -0.1718 | Ts |

Table S2. Y-randomization of the best QSAR model (best optimization run) for three independent splits

| Run                                                        | Training | Test   | Training | Test   | Training | Test   |
|------------------------------------------------------------|----------|--------|----------|--------|----------|--------|
| 0                                                          | 0.9747   | 0.8873 | 0.8264   | 0.9329 | 0.9041   | 0.8812 |
| 1                                                          | 0.0294   | 0.0006 | 0.0404   | 0.1584 | 0.0367   | 0.0564 |
| 2                                                          | 0.0023   | 0.1438 | 0.0012   | 0.0643 | 0.038    | 0.041  |
| 3                                                          | 0.0042   | 0.0358 | 0.0306   | 0      | 0.0533   | 0.046  |
| 4                                                          | 0.0417   | 0.2768 | 0.0027   | 0.1363 | 0.0054   | 0.0062 |
| 5                                                          | 0.0116   | 0.012  | 0.0667   | 0.1791 | 0.0191   | 0.3751 |
| 6                                                          | 0.0422   | 0.1843 | 0.0088   | 0.0272 | 0.0156   | 0.0033 |
| 7                                                          | 0.0009   | 0      | 0.0003   | 0.1602 | 0.0286   | 0.0111 |
| 8                                                          | 0.0486   | 0.2302 | 0.1065   | 0.054  | 0.0115   | 0.0623 |
| 9                                                          | 0.0345   | 0.0494 | 0.0913   | 0.0002 | 0.003    | 0.0465 |
| 10                                                         | 0.0186   | 0.2257 | 0.0255   | 0.0002 | 0.0016   | 0.1788 |
| $R_r^2$                                                    | 0.0234   | 0.1159 | 0.0374   | 0.078  | 0.0213   | 0.0827 |
| $^cR_p^2$                                                  | 0.9629   | 0.8273 | 0.8075   | 0.893  | 0.8934   | 0.8388 |
| $^cR_p^2 = R \times (R^2 - R_r^2)^{1/2}$ should be $> 0.5$ |          |        |          |        |          |        |

Table S3. The statistical quality of QSAR models developed with the GA-MLR method for dopamine transporter inhibition

| Fitting criteria             |                               |                                               |                                               |                                 |                              |                   |                             |                   |                  |                             |
|------------------------------|-------------------------------|-----------------------------------------------|-----------------------------------------------|---------------------------------|------------------------------|-------------------|-----------------------------|-------------------|------------------|-----------------------------|
| S                            | R <sup>2</sup>                | R <sup>2</sup> <sub>adj</sub>                 | R <sup>2</sup> -R <sup>2</sup> <sub>adj</sub> | LOF                             | RMSE <sub>tr</sub>           | MAE <sub>tr</sub> | RSS <sub>tr</sub>           | CCC <sub>tr</sub> | s                | F                           |
| 1                            | 0.9076                        | 0.8905                                        | 0.0171                                        | 0.1683                          | 0.286                        | 0.2087            | 2.6986                      | 0.9515            | 0.3161           | 53.0216                     |
| 2                            | 0.8754                        | 0.8515                                        | 0.024                                         | 0.2735                          | 0.3596                       | 0.2853            | 4.1373                      | 0.9336            | 0.3989           | 36.5427                     |
| 3                            | 0.8873                        | 0.8656                                        | 0.0217                                        | 0.2332                          | 0.332                        | 0.2693            | 3.5272                      | 0.9403            | 0.3683           | 40.9389                     |
| Internal validation criteria |                               |                                               |                                               |                                 |                              |                   |                             |                   |                  |                             |
| Sp                           | Q <sup>2</sup> <sub>loo</sub> | R <sup>2</sup> -Q <sup>2</sup> <sub>loo</sub> | RMSE <sub>cv</sub>                            | MAE <sub>cv</sub>               | PRESS <sub>cv</sub>          | CCC <sub>cv</sub> |                             |                   |                  |                             |
| 1                            | 0.8733                        | 0.0343                                        | 0.3348                                        | 0.2474                          | 3.6996                       | 0.9335            |                             |                   |                  |                             |
| 2                            | 0.817                         | 0.0584                                        | 0.4358                                        | 0.357                           | 6.0767                       | 0.9064            |                             |                   |                  |                             |
| 3                            | 0.8263                        | 0.061                                         | 0.4121                                        | 0.3356                          | 5.4352                       | 0.9087            |                             |                   |                  |                             |
| External validation criteria |                               |                                               |                                               |                                 |                              |                   |                             |                   |                  |                             |
| Sp                           | RMSE <sub>ext</sub>           | MAE <sub>ext</sub>                            | PRESS <sub>ext</sub>                          | R <sup>2</sup> <sub>m(av)</sub> | ΔR <sup>2</sup> <sub>m</sub> | k                 | k'                          |                   |                  |                             |
| 1                            | 1.5504                        | 1.2919                                        | 24.0374                                       | 0.5654                          | 0.1780                       | 0.8488            | 1.1356                      |                   |                  |                             |
| 2                            | 0.8703                        | 0.6709                                        | 8.3317                                        | 0.5846                          | 0.0387                       | 0.9778            | 1.0169                      |                   |                  |                             |
| 3                            | 0.8474                        | 0.6632                                        | 7.8995                                        | 0.6046                          | 0.0220                       | 0.9720            | 1.0177                      |                   |                  |                             |
| Predictions by LOO           |                               |                                               |                                               |                                 |                              |                   |                             |                   |                  |                             |
| Sp                           | R <sup>2</sup>                | R <sup>2</sup> <sub>0</sub>                   | k'                                            | C <sub>los</sub> '              | r <sup>2</sup> <sub>m</sub>  | R <sup>2</sup>    | R <sup>2</sup> <sub>0</sub> | k                 | C <sub>los</sub> | R <sup>2</sup> <sub>m</sub> |
| 1                            | 0.8736                        | 0.8606                                        | 0.9981                                        | 0.0149                          | 0.7738                       | 0.8736            | 0.8733                      | 1.0003            | 0.0004           | 0.858                       |
| 2                            | 0.8229                        | 0.8086                                        | 1.0023                                        | 0.0175                          | 0.7243                       | 0.8229            | 0.8187                      | 0.9949            | 0.0052           | 0.7694                      |
| 3                            | 0.828                         | 0.8078                                        | 0.9985                                        | 0.0244                          | 0.7103                       | 0.828             | 0.8264                      | 0.9988            | 0.0019           | 0.7954                      |

R<sup>2</sup> – The Coefficient of Determination; R<sup>2</sup><sub>adj</sub> – adjusted R<sup>2</sup>  
 LOF – Lack-of-fit  
 LOO – Leave One Out  
 RMSE – Root Mean Square Error; RMSE<sub>tr</sub> – for training set, RMSE<sub>cv</sub> – for internal validation; RMSE<sub>ext</sub> – for external validation  
 MAE – Mean Absolute Error; MAE<sub>tr</sub> – for training set, MAE<sub>cv</sub> – for internal validation  
 RSS – Residual Sum of Squares  
 CCC – The Concordance Correlation Coefficient; CCC<sub>tr</sub> – for training set, CCC<sub>cv</sub> – for internal validation  
 s – Standard Deviation  
 Sp – Split  
 PRESS – The Predicted Residual Error Sum of Squares; PRESS<sub>cv</sub> – for internal validation; PRESS<sub>ext</sub> – for external validation  
 R<sup>2</sup><sub>m</sub>, R<sup>2</sup><sub>m(av)</sub>, ΔR<sup>2</sup><sub>m</sub> – [49,50]  
 R<sup>2</sup><sub>0</sub>, k, k' – Golbraikh A, Tropsha A, J. Mol. Graph. Model. 20 (2002) 269.  
 In predictions by LOO “'” indicates Exp(x) vs. Pred(y) while without indicates Pred(x) vs. Exp(y)

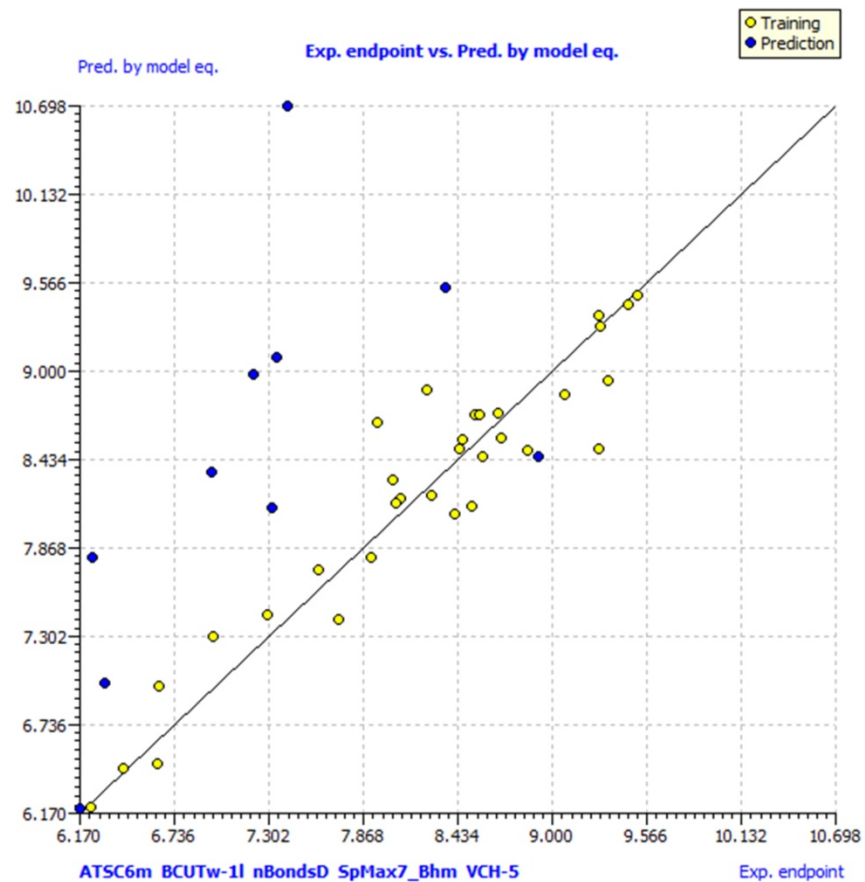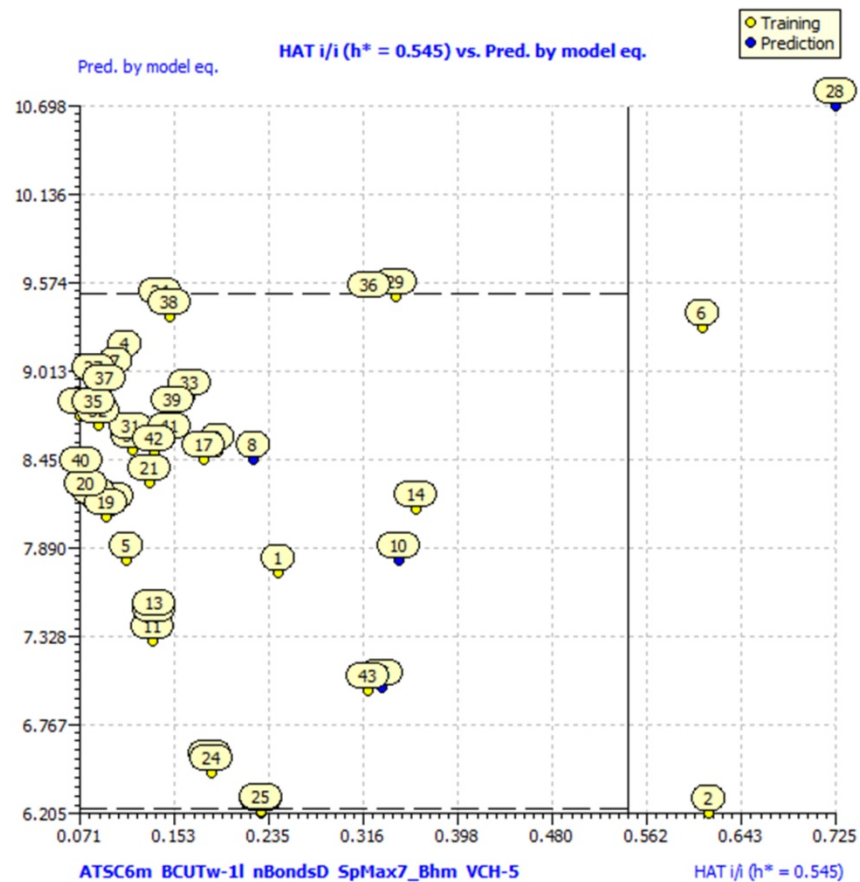

Figure S1. Left) Graphical representation of developed QSAR model with GA-MLR method for split 1; Right) Graphical representation of applicability domain established for split 1.

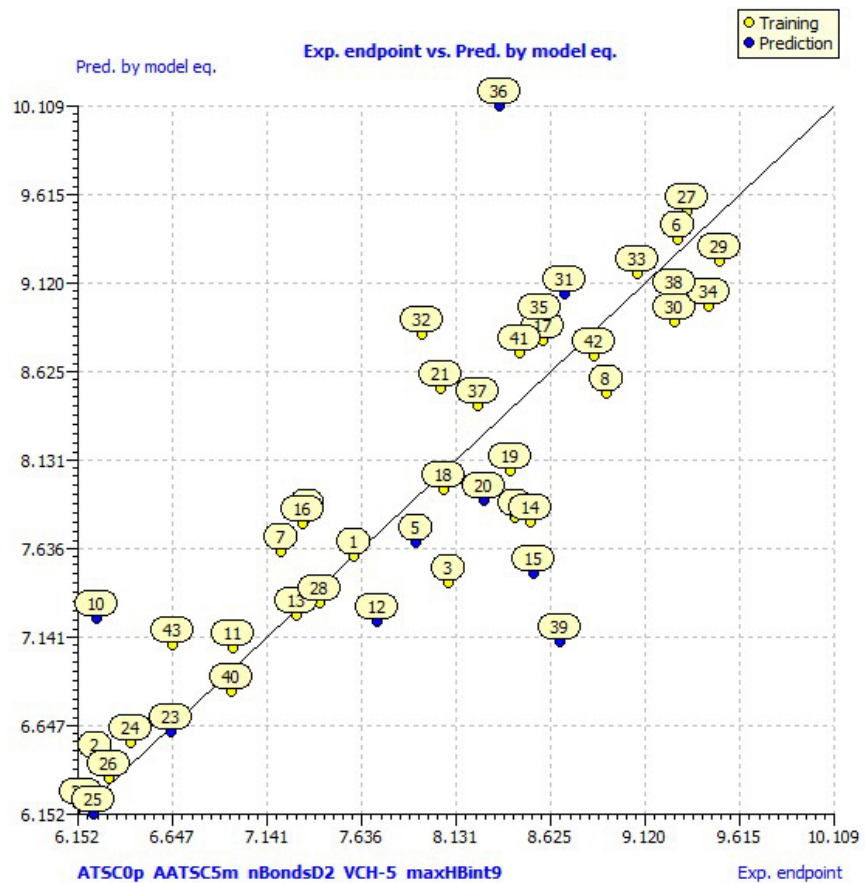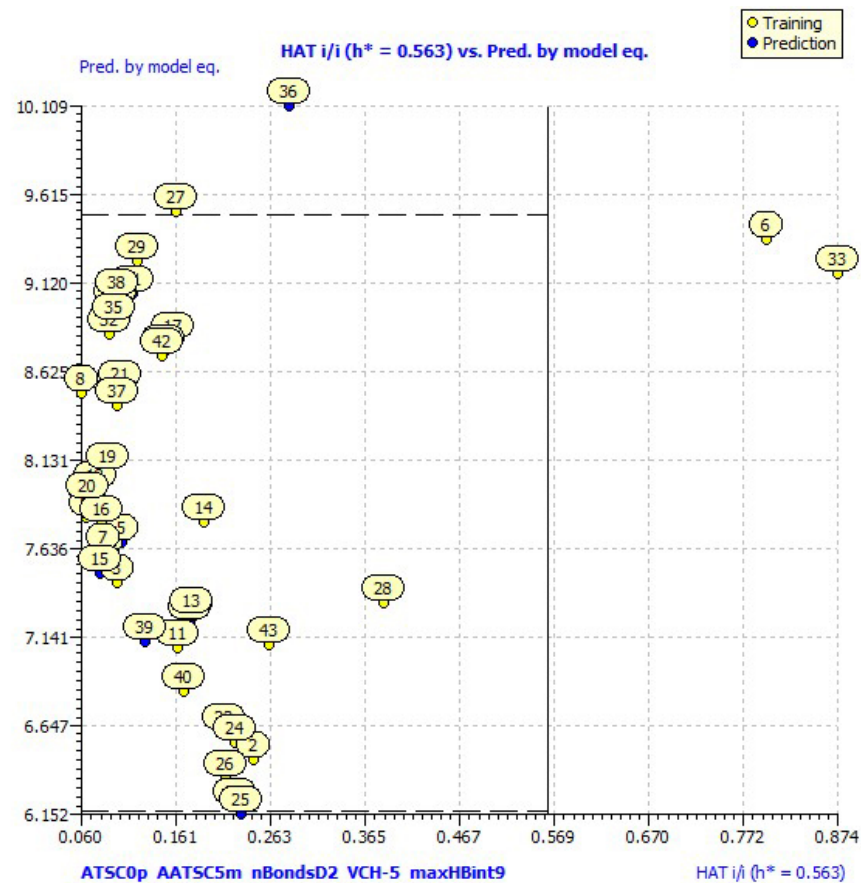

Figure S2. Left) Graphical representation of developed QSAR model with GA-MLR method for split 2; Right) Graphical representation of applicability domain established for split 2.

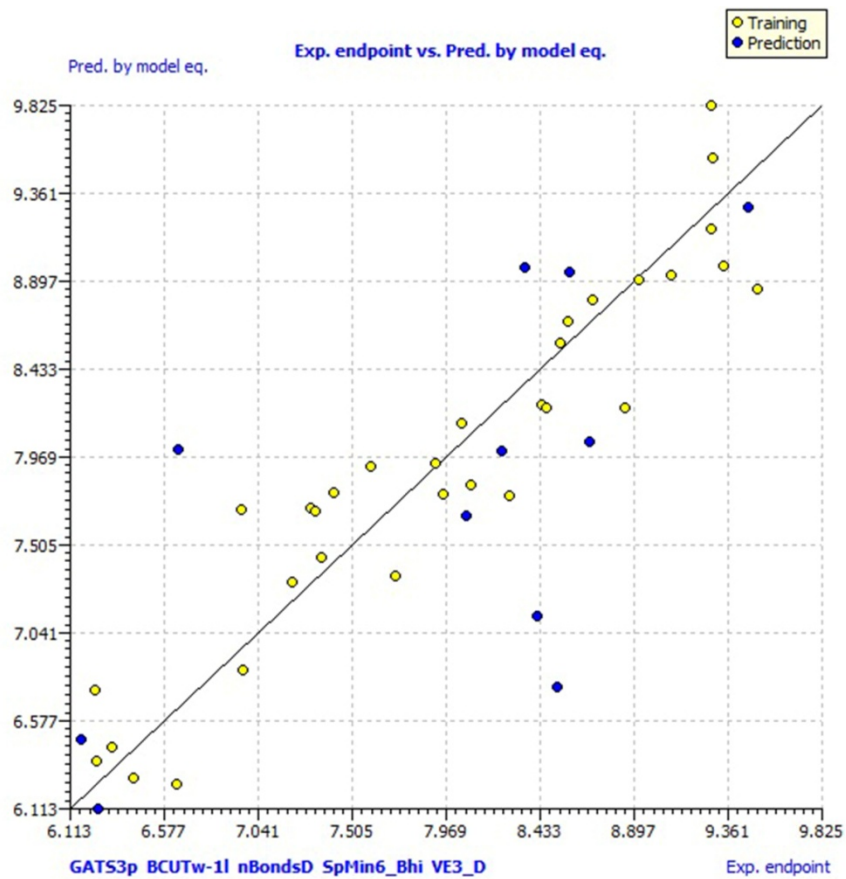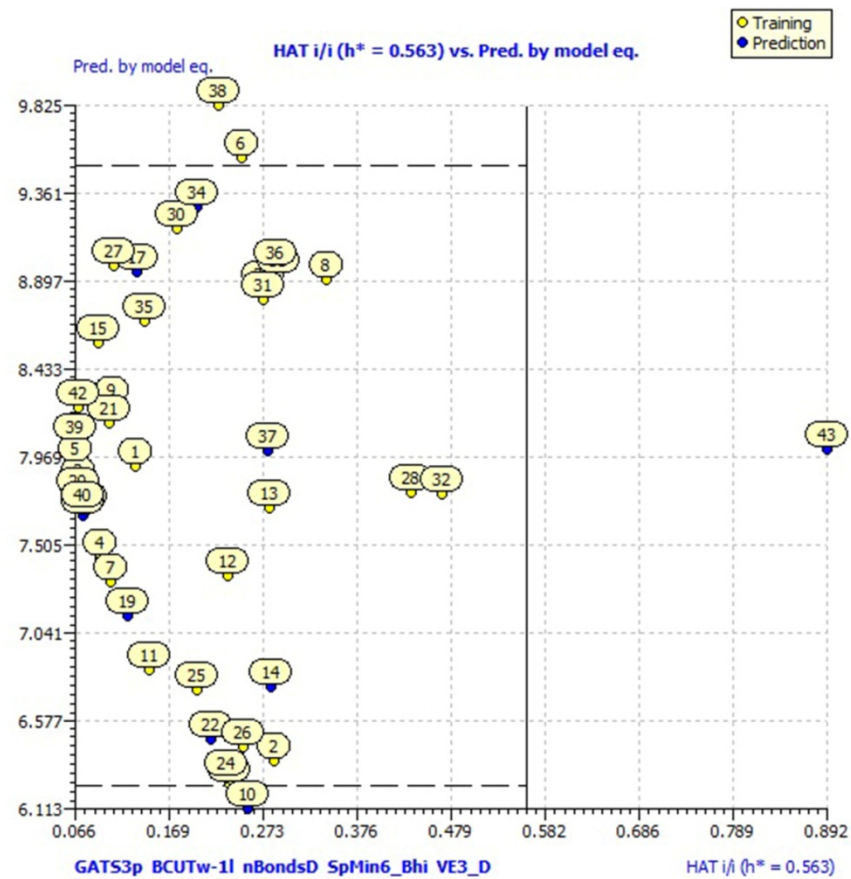

Figure S3. Left) Graphical representation of developed QSAR model with GA-MLR method for split 3; Right) Graphical representation of applicability domain established for split 3.



Table S4. The list of SAKs together with their correlation weights for the three runs of the Monte Carlo optimization

| SA(CW)        | CW       |          |          | SA(CW)       | CW       |          |          | SA(CW)        | CW       |          |          | SA(CW)        | CW       |          |          | SA(CW)        | CW       |          |          |
|---------------|----------|----------|----------|--------------|----------|----------|----------|---------------|----------|----------|----------|---------------|----------|----------|----------|---------------|----------|----------|----------|
|               | Run 1    | Run 2    | Run 3    |              | Run 1    | Run 2    | Run 3    |               | Run 1    | Run 2    | Run 3    |               | Run 1    | Run 2    | Run 3    |               | Run 1    | Run 2    | Run 3    |
| #.....        | 0.13838  | -0.61717 | 0.23662  | Br.(...1...  | -1.14836 | -0.78621 | 0.05237  | P4E0o...7-..  | 0.36242  | -0.09638 | 0.28747  | PT2-I...2...  | 0.30344  | 0.59463  | 1.52808  | VS3-C...6...  | 0.2546   | 0.18156  | 0.23146  |
| \$10000000    | 2.69353  | -0.54565 | 1.66091  | Br.....      | 1.1898   | 0.18389  | 0.16716  | NNC-C...101.  | -0.60766 | 0.10086  | 0.17896  | PT2-Cl...2... | 0.5359   | 0.0903   | -0.72561 | VS3-C...7...  | 0.29217  | 0.11761  | 0.2746   |
| \$10000001    | 2.14614  | 0.22365  | 0.40735  | Br.c...1...  | 0.36301  | -0.36323 | -0.18217 | NNC-C...110.  | 0.07715  | 0.30667  | 2.48372  | PT2-N...1...  | -1.23098 | 0.19437  | -0.93134 | VS3-C...8...  | 0.04874  | -0.02903 | 0.12174  |
| \$10000010    | -0.64534 | 1.23135  | 2.11634  | I.....       | 0.36599  | -0.63527 | 2.49334  | NNC-C...202.  | 2.12037  | 0.35213  | 0.72849  | PT2-N...2...  | 0.27268  | 0.37417  | 0.69884  | VS3-C...9...  | 0.30291  | -0.93651 | 0.03715  |
| \$10000100    | 1.30065  | 0.30289  | 0.47072  | I.c...1...   | 0.42928  | 0.32488  | 2.27789  | NNC-C...211.  | 0.28844  | 0.8152   | 0.36177  | PT2-N...3...  | -0.8636  | -0.24291 | -0.77606 | VS3-F...4...  | 0.35192  | 0.15352  | 0.34707  |
| \$11000000    | 0.22522  | 2.35682  | 2.04787  | Cl.(.....    | 0.49359  | 2.28092  | -0.49422 | NNC-C...220.  | 0.22593  | 0.45802  | 0.01177  | PT2-N...4...  | 0.08229  | 0.30006  | 0.00474  | VS3-Br...4... | -0.11203 | 0.42854  | -0.6804  |
| \$11000100    | -0.98729 | 0.02907  | 1.85065  | Cl.(...1...  | 0.4604   | 0.04948  | 1.02237  | NNC-C...303.  | 0.09931  | 0.35359  | 1.27014  | PT2-O...2...  | 0.05102  | 0.06947  | 0.47979  | VS3-Br...7... | 2.14889  | 0.08725  | 2.14592  |
| \$11000110    | -0.94115 | -0.93591 | -0.73517 | Cl.....      | -0.5869  | 2.10764  | 0.24751  | NNC-C...312.  | 1.24101  | 0.16223  | 0.82881  | PT2-O...3...  | 0.27782  | -0.45908 | 0.41897  | VS3-I...4...  | 0.51432  | 0.46746  | 2.29038  |
| \$11001100    | 1.15157  | 0.14948  | 2.42221  | Cl.1.....    | 2.0818   | -0.35107 | -0.88289 | NNC-C...321.  | 0.29841  | -0.52601 | -0.89912 | PT2-o...3...  | 0.55526  | -0.07325 | 0.56728  | VS3-Cl...4... | 0.27626  | 0.10477  | 0.3521   |
| \$1010000100  | 0.33382  | 0.04101  | 0.56747  | Cl.c...1...  | -1.36906 | 0.39877  | 1.65054  | NNC-C...330.  | 0.04581  | -0.96846 | 0.29336  | PT3-C...1...  | 0.14761  | -0.53112 | -0.82961 | VS3-Cl...5... | 0.52616  | 0.3853   | 2.11651  |
| \$1010001000  | -0.90826 | -0.29902 | -1.34069 | Cmax.1.....  | 0.12281  | 0.25367  | 0.49301  | NNC-F...110.  | 0.10102  | 0.41344  | 0.47332  | PT3-C...2...  | 0.4518   | -0.53337 | 0.13449  | VS3-Cl...6... | 0.31841  | 1.07057  | 0.09232  |
| \$10011000000 | -0.75273 | 0.3343   | -0.90777 | Cmax.2.....  | 0.25293  | 0.06079  | -0.0183  | NNC-Br...110. | 0.0606   | 0.28512  | 2.21623  | PT3-C...3...  | 0.47383  | 0.47577  | 0.402    | VS3-Cl...7... | 0.33934  | 2.19271  | 0.38047  |
| \$11010000000 | -0.75254 | 0.32472  | 0.4699   | Cmax.3.....  | -0.01254 | 0.4238   | 0.58241  | NNC-I...110.  | 0.49556  | 0.40994  | 2.64196  | PT3-C...4...  | 0.03346  | 0.02138  | 0.09068  | VS3-N...10..  | 0.39979  | 0.17363  | 0.29201  |
| (.....        | 0.10389  | -0.69416 | 0.41973  | HALO00000000 | 0.88245  | 0.02008  | 0.74961  | NNC-Cl...110. | 2.03959  | 0.07074  | 2.21744  | PT3-C...5...  | 0.45041  | 0.34684  | 0.18364  | VS3-N...11..  | 0.01458  | 0.40362  | 0.31021  |
| (...C...#...  | -0.78715 | 0.1076   | -0.51352 | HALO00010000 | 0.32252  | 0.59746  | 1.05333  | NNC-N...110.  | 0.02407  | -0.43192 | -0.53326 | PT3-C...6...  | -0.82242 | 0.01883  | -0.5623  | VS3-N...12..  | 0.29321  | 4.30563  | 0.12795  |
| (...O...(...  | 0.08421  | -0.33465 | -0.09698 | HALO00100000 | 0.43922  | 0.40955  | 0.41236  | NNC-N...202.  | -0.61507 | 0.07083  | -0.07626 | PT3-C...7...  | 0.09117  | 0.08191  | 0.39306  | VS3-N...13..  | 0.50232  | -0.4992  | 0.04326  |
| (...c...(...  | -0.89406 | -0.91774 | -0.60226 | HALO01000000 | 0.29763  | 0.08342  | 0.62896  | NNC-N...211.  | 0.12067  | 0.09847  | 0.03073  | PT3-C...8...  | 0.25955  | 0.43827  | 2.24564  | VS3-N...4...  | 0.449    | 1.4732   | -0.79704 |
| +++B2--B3==   | -0.74578 | 0.15598  | -0.96146 | HALO01100000 | -0.89361 | -0.3822  | -1.08204 | NNC-N...220.  | 0.06181  | 0.1597   | 0.61758  | PT3-C...9...  | -0.01842 | 0.15112  | -0.0614  | VS3-N...5...  | 0.15327  | 0.33214  | 0.34154  |
| +++F--B3==    | -0.37215 | -0.76411 | -0.82929 | HALO10000000 | 0.38616  | 0.03032  | 0.18164  | NNC-N...330.  | -0.94704 | 0.29236  | 0.03173  | PT3-F...2...  | 0.02354  | 0.1418   | 0.27506  | VS3-N...6...  | 0.27673  | -0.37917 | -1.71427 |
| +++F--Cl==    | 2.42109  | 2.26814  | 0.21866  | HALO11000000 | 2.28262  | 2.15247  | 2.43827  | NNC-O...110.  | -0.91857 | 0.27748  | 0.25074  | PT3-Br...2... | -0.47549 | -0.27382 | -0.91685 | VS3-N...7...  | -0.57832 | 0.48312  | 0.00542  |
| +++F--N==     | 0.39311  | 0.10733  | 0.19088  | N...#.....   | -0.78409 | 1.44807  | 2.08279  | NNC-O...211.  | -2.03871 | -1.07501 | -0.16696 | PT3-Br...3... | 2.13932  | 0.12193  | 0.16155  | VS3-N...8...  | -0.61866 | -0.09834 | 0.44429  |
| +++F--O==     | 0.40102  | -0.15371 | -0.53361 | N...#...C... | 1.07809  | 0.05628  | 2.31816  | NNC-O...220.  | 0.48415  | 0.3408   | 2.06967  | PT3-I...2...  | 0.19602  | 2.74965  | 0.33612  | VS3-N...9...  | -0.86414 | 0.25423  | 1.16629  |
| +++Cl--Br==   | -0.7783  | 0.28837  | -0.78479 | N...(.....   | 0.17889  | 0.03952  | 0.30752  | NNC-o...211.  | 0.42751  | 0.28582  | 0.0407   | PT3-Cl...2... | 0.0343   | 0.51754  | -0.65494 | VS3-O...10..  | 0.48919  | 0.06177  | 0.47062  |
| +++Cl--N==    | -0.2194  | 0.5215   | 0.05276  | N...(...1... | 0.03641  | 0.00922  | 0.48791  | NNEOC...100.  | 0.08079  | 0.21305  | 0.22034  | PT3-Cl...3... | 2.13474  | 1.3856   | 2.43823  | VS3-O...6...  | 0.00109  | -0.49169 | -0.56489 |
| +++Cl--O==    | -0.22421 | 0.65431  | -0.58629 | N...(2...    | 0.14712  | 0.54228  | 0.1226   | NNEOC...109.  | 0.05832  | 0.46903  | 0.18464  | PT3-N...2...  | -0.48688 | 0.34767  | -0.33673 | VS3-O...7...  | 2.44615  | 0.28668  | 0.17548  |
| +++Br--N==    | 1.99544  | 1.38663  | 0.97275  | N...(C...    | 0.2834   | -0.87477 | 0.26888  | NNEOC...200.  | 0.10552  | 0.39378  | 0.2217   | PT3-N...3...  | -0.70007 | -0.94751 | -0.94952 | VS3-O...9...  | 0.20806  | 0.41122  | 0.00554  |
| +++Br--O==    | 1.04325  | 0.79443  | 0.699    | N.....       | 0.19611  | -0.66385 | -0.35664 | NNEOC...209.  | -0.21825 | -0.4051  | 0.15965  | PT3-N...4...  | 0.09105  | 0.37765  | 0.01104  | VS3-o...12..  | 0.42145  | 0.23882  | 1.82934  |
| +++I--N==     | 0.48471  | 0.24037  | 2.07521  | N...1...(... | 1.40684  | 0.28944  | 1.25064  | NNEOC...218.  | 0.17897  | 0.3788   | 0.23805  | PT3-N...5...  | 2.3783   | 0.28315  | 2.34466  | Smax.0.....   | 1.78918  | 2.06471  | -0.18932 |
| +++Cl--B3==   | 0.04084  | 0.28841  | 0.34993  | N...1.....   | -0.82163 | -0.13277 | 0.1324   | NNEOC...300.  | 0.3649   | 0.3965   | -0.94947 | PT3-O...3...  | 0.31105  | 0.36982  | 0.29957  | [...(.....    | 0.18869  | 0.24538  | 0.4076   |
| +++N--B2==    | 0.26863  | -0.5593  | -0.37728 | N...1...C... | 0.21354  | -0.95972 | 0.28189  | NNEOC...309.  | -0.94256 | -0.76002 | -0.39038 | PT3-O...4...  | -0.97757 | -3.44294 | 0.38159  | [...(1...     | -0.19506 | 2.00962  | 0.8708   |
| +++N--B3==    | 0.1967   | 0.42536  | -0.86168 | N...=.....   | -0.88348 | 0.07674  | -0.03084 | NNEOC...318.  | 0.00115  | 0.12237  | 0.20628  | PT3-O...5...  | 0.33994  | 1.26891  | 0.34554  | [.....        | 0.15659  | 0.44316  | 0.46781  |
| +++N--O==     | 0.46343  | 0.1166   | -0.99795 | N...=...C... | 0.01144  | 0.08325  | 0.27388  | NNEOC...327.  | 0.95215  | 0.25625  | -0.57177 | PT3-o...5...  | 0.15806  | 0.74664  | 0.36977  | [...1...(...  | 0.16517  | 0.01156  | 0.04752  |

|              |          |          |          |               |          |          |          |               |          |          |          |               |          |          |          |               |          |          |          |
|--------------|----------|----------|----------|---------------|----------|----------|----------|---------------|----------|----------|----------|---------------|----------|----------|----------|---------------|----------|----------|----------|
| +++O--B2==   | -1.3313  | 0.11956  | -1.88736 | N...C...(...  | 0.43867  | -1.30789 | -0.74547 | NNEOF...109-  | 0.17921  | -0.61178 | 0.11169  | PT4-C...1...  | -0.711   | -0.179   | 0.06011  | [...1.....    | 0.27488  | -2.02619 | 1.11809  |
| 1...(.....   | 0.326    | 0.13516  | 0.27226  | N...C.....    | -0.70525 | 0.49576  | -2.41753 | NNE0Br...109- | 0.12398  | 0.94264  | 0.45711  | PT4-C...10..  | 0.20772  | 0.06652  | -0.04301 | [...2...(...  | 0.32771  | 0.36025  | -0.17675 |
| 1.....       | 0.1971   | 0.38049  | 0.00735  | N...C...C...  | 0.18511  | 0.48335  | -1.26857 | NNE0I...109-  | 0.45804  | 2.40822  | 2.24379  | PT4-C...11..  | 0.18269  | 0.20677  | 0.39095  | [...2.....    | -0.20662 | 0.17102  | 0.42707  |
| 1...C...(... | -1.30758 | 1.99449  | -1.44054 | N...O...1...  | -0.1143  | -0.56913 | 0.23582  | NNE0Cl...109- | -0.78008 | 0.00698  | 2.2605   | PT4-C...12..  | 0.27066  | 0.32588  | -0.63057 | [...H.....    | 0.32303  | 0.40719  | -0.00147 |
| 1...N...(... | 2.19144  | 2.70859  | 0.86071  | N...c...1...  | 0.03475  | 2.39795  | 0.25439  | NNE0N...109-  | 0.20535  | 1.17807  | -0.59433 | PT4-C...13..  | 1.05824  | 0.17449  | 0.2341   | [...c...(...  | 0.19574  | 0.14394  | -0.02626 |
| 1...N...1... | 0.20017  | -0.5899  | -0.56114 | O...(.....    | 2.13402  | 0.22007  | 0.0014   | NNE0N...200-  | -0.93903 | -1.33996 | 0.03903  | PT4-C...17..  | 0.35549  | 0.11698  | -0.18877 | [...c...1...  | 0.22839  | 0.0645   | 0.1279   |
| 1...c...(... | 0.19733  | 0.12435  | 0.1665   | O...(1...)    | 0.19196  | 0.39158  | 0.47573  | NNE0N...209-  | 0.05408  | -0.65243 | 0.26188  | PT4-C...2...  | -0.00758 | 2.49726  | -0.1576  | [...c...2...  | 0.08704  | 0.05247  | 0.16351  |
| 2...(.....   | 0.26218  | 0.42509  | 0.13953  | O...(2...     | -0.62633 | 0.31347  | 0.45885  | NNE0N...218-  | 0.16194  | 0.27675  | 0.75616  | PT4-C...3...  | 0.18736  | 0.48544  | 0.38143  | [...n...1...  | -0.932   | -0.59736 | -0.81222 |
| 2.....       | 0.22092  | -0.07729 | 0.42192  | O...(C...)    | -0.60554 | 0.17341  | -0.99749 | NNE0N...327-  | 0.34089  | 0.04335  | 0.10784  | PT4-C...4...  | 0.19395  | -0.93669 | -0.65286 | [...n...H...  | 0.15037  | 0.02191  | -0.29212 |
| 2...c...(... | 0.17609  | -0.83688 | 0.465    | O...(O...)    | 0.2872   | 0.20701  | 0.20139  | NNE0O...109-  | 0.06467  | 0.42192  | 0.25293  | PT4-C...5...  | 0.4296   | 0.24403  | -0.75097 | c...(.....    | 0.3549   | 0.43123  | 0.26374  |
| 2...c...1... | 2.45426  | 0.40825  | 0.12489  | O.....        | 0.07183  | 0.05921  | 2.21248  | NNE0O...209-  | 2.37014  | 0.17657  | 0.31219  | PT4-C...6...  | 0.06979  | -0.29818 | 0.25553  | c...(1...)    | 0.25861  | 0.76506  | 0.31556  |
| 3.....       | 2.41789  | 0.71499  | 3.351    | O...1.....    | -0.36078 | 0.20202  | 0.3711   | NNE0O...218-  | 0.17136  | 0.48653  | 0.25782  | PT4-C...7...  | 0.40062  | 0.00103  | 0.46737  | c...(2...     | 2.40207  | 2.23259  | 0.61036  |
| 3...C...1... | 2.21687  | 0.28108  | 1.13315  | O...1...C...  | 0.31074  | -0.8554  | -0.03128 | NNE0o...209-  | -0.64342 | -0.61009 | 0.3367   | PT4-C...8...  | -0.03439 | 2.46095  | 0.31404  | c...(C...)    | 0.00746  | 0.00276  | 0.35037  |
| 3...c...1... | 0.26946  | 0.13765  | -0.92557 | O...C...(...  | -0.97477 | -0.02834 | -0.65338 | NOSP10000000  | -0.71395 | 0.14793  | 1.27025  | PT4-C...9...  | 0.30203  | 0.07847  | 0.68656  | c...(N...)    | 1.48228  | 1.11785  | 0.99269  |
| 3...c...2... | 2.40312  | 0.12507  | 0.60467  | O...C.....    | 2.20397  | 2.18745  | -0.19994 | NOSP11000000  | 0.62079  | 0.40113  | 0.31723  | PT4-F...2...  | 0.07787  | -0.03821 | 2.21257  | c...(O...)    | 0.69905  | 0.1274   | 2.08234  |
| =...(.....   | 0.41356  | 0.04898  | 1.38226  | O...C...1...  | -0.65374 | 0.24506  | -0.35268 | S2E0C...1-..  | -0.85878 | 0.05272  | -0.86052 | PT4-Br...2... | -0.0814  | -0.66787 | 0.01809  | c...(.[...    | -0.92613 | 0.30798  | -0.03019 |
| =.....       | -0.86506 | -0.00786 | -0.77812 | O...C...C...  | 2.03589  | 0.39524  | 0.22382  | S2E0C...10-   | 0.15868  | 2.19414  | 0.35353  | PT4-Br...5... | -0.20703 | -0.05245 | -0.71928 | c...(c...c... | -0.99541 | -0.68932 | -1.15135 |
| =...1.....   | 0.42866  | 0.31167  | 0.55879  | O...N.....    | 0.1622   | -0.91096 | 0.07043  | S2E0C...11-   | 0.22039  | 0.42545  | 0.26474  | PT4-I...2...  | 2.32293  | 1.52646  | 0.11067  | c.....        | 0.01909  | 0.2522   | 0.05212  |
| =...C...(... | 0.14485  | -0.78311 | -0.67928 | O...N...=...  | -0.82704 | 0.18564  | 0.00781  | S2E0C...2-..  | 0.10685  | 0.32299  | 0.25661  | PT4-Cl...2... | 0.03003  | 0.29404  | -0.88981 | c...1...(...  | 0.71458  | 0.36949  | 0.12498  |
| =...C...1... | 1.16923  | 0.15407  | 0.56754  | O...c...1...  | -0.76125 | 2.2457   | 0.39167  | S2E0C...3-..  | -0.40729 | 0.4043   | 0.08092  | PT4-Cl...5... | -0.91267 | 1.53403  | 2.04272  | c...1.....    | 0.28346  | 0.10346  | 0.43728  |
| =...c...1... | 0.09497  | 0.0514   | -0.79687 | O...c...2...  | 2.06257  | 0.37741  | 2.12595  | S2E0C...4-..  | 0.09375  | 0.63993  | -0.00706 | PT4-N...2...  | 1.40451  | 0.01054  | 0.98393  | c...1...C...  | 0.34047  | 0.25526  | 0.16183  |
| C...#.....   | 0.48528  | -0.62005 | 0.37696  | P2E0C...0-..  | 0.22735  | 0.04823  | 0.11842  | S2E0C...5-..  | 0.48756  | 0.1549   | 0.47608  | PT4-N...3...  | -0.04451 | 0.24941  | 0.99922  | c...1...Cl..  | 0.3852   | 0.39582  | 0.08028  |
| C...#...C... | 0.07936  | 0.47037  | 0.52879  | P2E0C...1-..  | -0.34985 | 0.23981  | 0.12593  | S2E0C...6-..  | 0.23889  | 0.09925  | 0.11639  | PT4-N...4...  | 0.73286  | 0.40291  | 0.28959  | c...1...N...  | -0.96506 | 0.36608  | 0.1089   |
| C...(.....   | 0.14417  | 0.6331   | 0.0473   | P2E0C...2-..  | 0.48004  | 2.01569  | 0.4044   | S2E0C...7-..  | 0.29067  | 0.25561  | 2.43726  | PT4-N...5...  | 0.17199  | 0.82187  | 0.18422  | c...1...[...  | 0.57193  | 0.04611  | 0.07835  |
| C...(1...)   | 0.63382  | 0.37214  | 0.72312  | P2E0C...3-..  | 0.34744  | 0.38819  | 0.33472  | S2E0C...8-..  | -2.14213 | -1.33219 | -0.73771 | PT4-N...6...  | 0.12101  | 2.42612  | 0.59358  | c...1...c...  | 2.20071  | 0.25028  | 0.21538  |
| C...(2...    | 0.38416  | 2.24803  | 0.68526  | P2E0F...1-..  | 0.62543  | -0.64362 | 0.0718   | S2E0C...9-..  | 0.03894  | 0.14262  | -0.82667 | PT4-N...7...  | 0.19796  | -0.77829 | 0.11956  | c...2...(...  | 0.28025  | -0.31725 | -2.39271 |
| C...(=...    | -0.89299 | 0.6216   | 2.6922   | P2E0Br...1-.. | 0.34371  | 0.05368  | -0.54597 | S2E0F...3-..  | 0.06309  | -0.8543  | -0.88042 | PT4-N...8...  | 0.28339  | 0.15885  | 0.22941  | c...2.....    | 0.0135   | -0.78172 | 0.39027  |
| C...(C...    | 0.13054  | 0.29098  | 0.1131   | P2E0L...1-..  | 0.45922  | 0.14491  | 0.3239   | S2E0Br...3-.. | -0.64339 | 0.3685   | -1.07618 | PT4-N...9...  | -0.67017 | 0.37959  | -0.04153 | c...2...c...  | 0.13981  | 2.08783  | 0.43353  |
| C.....       | 0.43818  | 0.09769  | 0.32623  | P2E0Cl...1-.. | 0.19522  | 0.28009  | 0.00777  | S2E0Br...4-.. | -0.04075 | 0.49149  | 2.18257  | PT4-O...3...  | 0.06635  | 0.36572  | 0.12217  | c...3.....    | 0.06231  | -0.22544 | 0.43061  |
| C...1...(... | 0.37322  | 0.32388  | -0.88361 | P2E0N...0-..  | -0.93459 | 0.01789  | 0.07872  | S2E0L...3-..  | 0.1921   | 0.2277   | 0.54439  | PT4-O...5...  | -0.80641 | 0.29186  | 0.00654  | c...3...C...  | -0.87863 | 0.32347  | 0.21345  |
| C...1.....   | 0.11161  | -0.67245 | 0.094    | P2E0N...1-..  | 0.26502  | 0.05116  | 0.26386  | S2E0Cl...3-.. | 0.25184  | 0.44916  | -0.2596  | PT4-O...6...  | 0.1405   | -0.02121 | 0.10303  | c...3...c...  | 2.26678  | 0.35622  | 2.16881  |
| C...1...=... | 0.29707  | 0.0519   | -0.90482 | P2E0N...2-..  | 0.0186   | 0.69538  | 0.22316  | S2E0Cl...4-.. | -0.20607 | 2.33305  | 0.18475  | PT4-O...8...  | 0.38318  | 0.52111  | -0.43594 | c...=.....    | 0.70607  | -0.028   | 0.35461  |
| C...1...C... | 0.46317  | -0.96285 | -0.43893 | P2E0O...0-..  | 0.2102   | -0.39063 | 0.35838  | S2E0N...2-..  | 0.10123  | 0.11856  | 2.48276  | PT4-O...9...  | 0.14845  | -0.65912 | 0.11437  | c...=...N...  | 0.05183  | 0.40302  | 0.25775  |
| C...3.....   | 0.45086  | 0.38356  | 0.44542  | P2E0O...1-..  | 0.37064  | 2.07936  | 0.01147  | S2E0N...3-..  | -0.55718 | 0.49725  | 1.36796  | PT4-o...9...  | -0.63749 | 0.13731  | 0.00835  | c...C...#...  | 0.44048  | 0.23782  | 0.02951  |
| C...=...(... | -0.51883 | -0.83225 | -0.59387 | P2E0o...1-..  | 0.3964   | -0.29419 | 0.17087  | S2E0N...4-..  | 0.04282  | 2.46688  | 0.41436  | Nmax.1.....   | 0.23372  | 0.12592  | 0.0242   | c...C...(...  | 0.40481  | 1.14391  | 0.00924  |

|              |          |          |          |              |          |          |          |              |          |          |          |              |          |          |          |               |          |          |          |
|--------------|----------|----------|----------|--------------|----------|----------|----------|--------------|----------|----------|----------|--------------|----------|----------|----------|---------------|----------|----------|----------|
| C...=.....   | 0.15117  | -0.50382 | 0.22446  | P3E0C...0..  | 0.14075  | 0.05367  | 0.38958  | S2E0N...5..  | 2.43082  | 0.25082  | 0.23302  | Nmax.2.....  | 0.47342  | 0.31207  | 2.48259  | c...C.....    | 0.52272  | 0.1474   | -0.06948 |
| C...=...1..  | -0.66222 | 0.44635  | -0.53549 | P3E0C...1..  | 0.46942  | 0.06948  | 0.35866  | S2E0N...6..  | 0.08641  | 0.01276  | 0.20753  | Nmax.3.....  | -0.69846 | -2.22662 | -0.60009 | c...C...1..   | -0.00343 | 0.12727  | -0.93882 |
| C...C...#... | -0.60925 | 0.34101  | -1.00899 | P3E0C...2..  | 0.53692  | 0.43353  | 0.30722  | S2E0N...7..  | 2.35278  | 0.3406   | 0.26896  | Nmax.4.....  | -0.33926 | 0.30953  | 0.42038  | c...C...C...  | 0.12749  | 0.18718  | 1.26817  |
| C...C...(... | 0.18592  | -0.80232 | -0.53583 | P3E0C...3..  | 0.1054   | 0.47413  | 0.57951  | S2E0...3..   | -0.57948 | 0.40039  | -0.94141 | Omax.0.....  | 0.08273  | 0.40312  | 0.4738   | c...F.....    | 0.00537  | 0.29337  | -0.51655 |
| C...C.....   | 0.14218  | 0.14285  | 0.33624  | P3E0C...4..  | -0.71781 | 0.42287  | 0.20757  | S2E0...4..   | 0.14674  | 0.42325  | 0.13872  | Omax.1.....  | 0.13754  | 0.17473  | 0.49387  | c...Br.....   | 0.53822  | 2.40597  | 0.35411  |
| C...C...1..  | 0.18586  | 0.13955  | -2.71432 | P3E0C...5..  | 2.07297  | 0.36396  | 0.3627   | S2E0...5..   | -0.14819 | -4.1553  | -0.12551 | Omax.2.....  | 0.44113  | 0.2183   | 0.1192   | c...I.....    | 2.14681  | 2.19497  | 0.31537  |
| C...C...=... | 0.15003  | -0.99791 | -0.12226 | P3E0C...6..  | 0.21509  | 0.59836  | 2.07131  | S2E0...6..   | -0.55425 | 0.30194  | -0.28026 | Omax.4.....  | 0.1004   | 0.05016  | 0.91312  | c...Cl.....   | -2.39972 | 0.9342   | 0.75556  |
| C...C...C... | 0.27673  | -0.69323 | 0.2685   | P3E0F...1..  | 0.11289  | 1.22581  | 0.85885  | S2E0...6..   | 0.00353  | 0.05336  | 0.27773  | VS2-C...10.. | 0.00398  | 0.35687  | 0.36726  | c...N.....    | -0.25309 | 0.40986  | -0.46039 |
| C...N...(... | 0.40512  | 0.08026  | -0.58338 | P3E0Br.1..   | -0.03056 | -0.85029 | -0.91258 | S3E0C...10.. | -0.41979 | -0.36682 | -0.75858 | VS2-C...11.. | 0.43603  | -1.20667 | -0.98324 | c...O.....    | 0.09562  | 0.28732  | 1.31973  |
| C...N...1..  | 0.30311  | 0.42463  | -0.83987 | P3E0Br.2..   | 0.17125  | 0.156    | 0.04853  | S3E0C...11.. | 0.18215  | -0.38263 | 2.2749   | VS2-C...12.. | 0.19187  | 0.37024  | 0.20393  | c...O...C...  | 0.03931  | -0.62297 | 0.02425  |
| C...N...=... | -0.7622  | 0.40239  | -0.64804 | P3E0L...1..  | 0.72511  | 0.02194  | 2.46201  | S3E0C...12.. | 0.02598  | 0.16884  | 0.34743  | VS2-C...13.. | 0.44289  | 0.42877  | 0.38576  | c...[.....    | 0.03052  | 0.23805  | 0.34806  |
| C...N...C... | 0.08415  | 0.26548  | 2.41778  | P3E0Cl.1..   | 0.29131  | 0.4251   | 2.23792  | S3E0C...13.. | 0.13401  | 0.07843  | 0.15063  | VS2-C...14.. | 0.39125  | 0.01773  | 0.46382  | c...[...H...  | 0.4275   | 0.48102  | 0.42446  |
| C...O...(... | 0.32479  | 0.24119  | 1.00739  | P3E0Cl.2..   | 0.9703   | 0.09109  | -0.26979 | S3E0C...15.. | 0.15241  | 0.48218  | 0.29997  | VS2-C...2... | -0.5082  | -0.59089 | -0.52162 | c...c...(...  | 0.228    | 0.45076  | 0.04921  |
| C...c...1..  | 0.9918   | 0.3175   | -0.40953 | P3E0N...0..  | 0.26467  | -0.33584 | -0.93675 | S3E0C...16.. | 0.09239  | 0.40437  | 0.49044  | VS2-C...3... | -0.812   | 0.3512   | 0.20803  | c...c.....    | 0.43719  | 0.23359  | 0.24413  |
| C...c...2..  | 2.21815  | 0.35879  | -0.35273 | P3E0N...1..  | 2.31147  | 0.20255  | -0.79185 | S3E0C...2..  | 0.06608  | -0.08958 | 0.45282  | VS2-C...4... | 2.40876  | -0.3091  | 2.00836  | c...c...1..   | 0.20475  | 0.54003  | 0.18503  |
| C3....0..    | 2.39303  | 2.9498   | 3.51518  | P3E0N...2..  | 0.04964  | 0.15352  | 0.29539  | S3E0C...3..  | 0.84818  | 0.29012  | -0.53018 | VS2-C...5... | 0.33392  | -0.19748 | 0.25995  | c...c...2..   | 0.23283  | 0.13362  | -0.54485 |
| C4....0..    | 0.98293  | 4.23992  | 4.40297  | P3E0N...3..  | 0.67336  | 0.15467  | -0.88416 | S3E0C...4..  | 1.19972  | 0.35177  | 0.3293   | VS2-C...6... | 0.05634  | -0.48965 | 0.37871  | c...c...3...  | 0.71611  | 0.33665  | 1.14311  |
| C5....0..    | 1.49414  | 1.87563  | 0.67397  | P3E0...1..   | 0.2545   | 0.37467  | -0.31071 | S3E0C...5..  | 0.13587  | 0.19544  | 0.43269  | VS2-C...7... | -0.84665 | 0.46927  | 0.33867  | c...c...[...  | 1.07524  | 1.45722  | 0.48555  |
| C5...H.1..   | -0.7542  | 0.69465  | -0.75495 | P3E0...2..   | -0.64552 | -0.51524 | -1.38695 | S3E0C...6..  | -0.72612 | 0.43942  | 0.17472  | VS2-C...8... | 0.10465  | -0.53155 | 0.09432  | c...c...c...  | 1.33498  | 0.45174  | 0.19863  |
| C5...AH.1..  | -0.50555 | 0.21184  | 0.35328  | P3E0...3..   | 1.23608  | 2.00481  | 3.00191  | S3E0C...7..  | 0.0629   | 0.39753  | 0.19174  | VS2-C...9... | -0.74696 | -0.76581 | 0.2418   | c...n...(...  | 0.36109  | -0.90356 | 0.14452  |
| C6...A.2..   | 1.89089  | 1.51511  | 2.45889  | P3E0...3..   | -0.71721 | -0.90314 | 1.22025  | S3E0C...8..  | 0.24578  | 0.40149  | 0.03171  | VS2-F...4... | 0.08076  | -0.90274 | 0.23491  | c...n...1..   | 0.03952  | 0.27336  | 0.18609  |
| C6...AH.2..  | 0.26286  | 0.17349  | 0.2765   | P4E0C...0..  | 0.23655  | 0.48126  | 0.17601  | S3E0C...9..  | 0.18639  | 0.09555  | 0.15677  | VS2-Br.4...  | 0.32126  | 0.69383  | 0.46737  | c...n...2..   | 0.09281  | -0.06921 | 0.14077  |
| C6...AH.3... | -0.80076 | 0.12036  | -0.53884 | P4E0C...1..  | 0.01053  | 0.22546  | -0.5084  | S3E0F...3..  | 0.00711  | 0.15417  | 0.35322  | VS2-Br.5...  | -0.09643 | 0.02279  | 0.0556   | c...n...[...  | 0.38279  | 0.0762   | 0.32971  |
| C6...AH.4... | 2.20422  | 0.0875   | 2.44395  | P4E0C...10.. | 0.15996  | 2.42976  | 1.06508  | S3E0Br.3..   | 1.29499  | -0.44481 | -0.79741 | VS2-L...4... | 0.64841  | 0.59124  | 1.48194  | c...n...c...  | 0.01863  | 0.14285  | 0.49098  |
| C7....0..    | -0.59715 | 0.16596  | 0.41772  | P4E0C...11.. | 0.40099  | 0.44158  | 2.09127  | S3E0Br.6..   | 0.20582  | -0.08628 | 2.43953  | VS2-Cl.4...  | 0.27399  | 0.33416  | -0.24297 | n...(.....    | 1.00325  | 0.52773  | -0.38618 |
| C7...AH.1..  | 0.39676  | 0.72824  | -0.93483 | P4E0C...14.. | 0.44338  | 0.07186  | 0.57669  | S3E0L...3..  | 0.11732  | 0.05887  | -0.22512 | VS2-Cl.5...  | 0.32881  | 2.97762  | 0.31045  | n...(c...c... | -0.05936 | 1.23588  | 0.10348  |
| BOND00000000 | 0.28048  | 0.04271  | 0.45355  | P4E0C...2..  | 2.56879  | 2.22438  | 3.12611  | S3E0Cl.3..   | -0.53702 | 0.43954  | 0.22498  | VS2-N...3... | -0.49342 | 0.09119  | 2.30675  | n.....        | 0.3335   | -0.63566 | 0.24722  |
| BOND01000000 | 0.82212  | 0.01171  | -0.03454 | P4E0C...3..  | -0.0727  | 0.34347  | 0.25322  | S3E0Cl.4..   | 2.38811  | 1.3782   | 0.21563  | VS2-N...4... | -0.96253 | 0.12113  | -0.19388 | n...I...(...  | 0.47225  | -0.30262 | 0.25665  |
| BOND10000000 | -2.09477 | -0.88771 | -1.9978  | P4E0C...4..  | 0.09324  | -0.23108 | -0.72032 | S3E0Cl.5..   | -0.02845 | 0.17533  | 0.26402  | VS2-N...5... | 0.13151  | 0.23063  | 1.00898  | n...I.....    | 0.25654  | 0.01101  | 0.36174  |
| BOND11000000 | -0.9956  | 0.25402  | -0.79208 | P4E0C...5..  | 0.08977  | 0.106    | -0.07476 | S3E0Cl.6..   | 1.29396  | 2.06782  | 2.25541  | VS2-N...6... | -0.74617 | 0.49122  | -0.98484 | n...I...c...  | 0.24308  | 0.04408  | 1.49324  |
| F...(.....   | 0.05062  | 0.27784  | 0.03052  | P4E0C...6..  | 0.40702  | -0.02725 | 0.28945  | S3E0N...10.. | 0.0134   | 0.24844  | 2.10257  | VS2-N...7... | 0.16072  | 0.33447  | 0.44376  | n...2.....    | 0.03449  | 0.14849  | 0.0012   |
| F...(..1..   | 0.29409  | 0.63424  | 0.05635  | P4E0C...7..  | 1.45777  | -0.00986 | -0.85736 | S3E0N...2..  | 0.40489  | 0.41501  | -0.07336 | VS2-N...8... | 0.09822  | 1.29774  | 0.52599  | n...H.....    | 0.04367  | 0.1885   | -0.94768 |
| F.....       | 0.12149  | 0.12655  | 0.25292  | P4E0C...8..  | -0.90554 | 0.36923  | -0.5712  | S3E0N...3..  | 0.23147  | 0.56765  | 0.34876  | VS2-N...9... | 0.00949  | 0.58764  | -1.30279 | n...H...[...  | 0.23711  | 0.3409   | 2.07922  |
| F...c...1..  | 2.11848  | 0.11676  | 2.25415  | P4E0C...9..  | 0.48314  | -0.47001 | 2.33956  | S3E0N...4..  | -0.8317  | -0.53538 | 0.35646  | VS2-O...5... | 0.26087  | 0.34713  | 0.2861   | n...[...(...  | 0.32959  | 0.07277  | 0.47371  |
| EC0-C...1..  | 0.11314  | 0.04763  | -0.16303 | P4E0F...1..  | 0.41217  | 0.26868  | -0.50667 | S3E0N...5..  | 0.26059  | 0.15309  | 0.46638  | VS2-O...6... | 0.48735  | 2.45354  | 0.40081  | n...[.....    | 0.27145  | 0.45557  | 0.31441  |

|              |          |          |          |              |          |          |          |              |          |          |          |              |          |          |          |              |          |          |          |
|--------------|----------|----------|----------|--------------|----------|----------|----------|--------------|----------|----------|----------|--------------|----------|----------|----------|--------------|----------|----------|----------|
| EC0-C...2... | 0.07419  | 0.09905  | 1.39211  | P4E0Br..1-.. | 0.29179  | -0.51973 | -0.93707 | S3E0N...6... | 0.36828  | 0.22909  | 0.21502  | VS2-O...7... | -0.32747 | -0.07823 | 0.14478  | n...[...I... | -1.83257 | 0.12677  | 2.42536  |
| EC0-C...3... | 0.29889  | -0.67798 | -0.46687 | P4E0Br..4-.. | 0.08888  | 0.19715  | 0.1449   | S3E0N...7... | 2.03279  | 0.10874  | 0.08002  | VS2-O...8... | 0.76772  | 0.31454  | -0.88505 | n...[...H... | 0.09338  | 0.11316  | 0.2373   |
| EC0-F...1... | 0.00464  | 1.46204  | 1.34355  | P4E0L...1-.. | 0.48161  | 0.26482  | 1.88319  | S3E0N...8... | 0.29063  | 0.0669   | 2.01125  | VS2-o...8... | 0.26397  | 0.19143  | 0.7057   | n...[...c... | 0.08421  | 0.3665   | 0.0025   |
| EC0-Br..1... | -0.809   | 0.06021  | -0.63711 | P4E0Cl..1-.. | 0.34816  | 0.10943  | -0.01889 | S3E0N...9... | -0.89305 | 0.1475   | 0.0648   | VS3-C...10.. | 0.04506  | 2.16721  | 0.05531  | n...[...n... | 0.07331  | -0.50272 | -0.6449  |
| EC0-L...1... | 1.3286   | 1.63231  | 0.32414  | P4E0Cl..4-.. | 2.03097  | 2.4358   | -0.04972 | S3E0O...4... | 0.36001  | 0.12784  | 0.2017   | VS3-C...11.. | 0.25652  | -0.55626 | 0.26503  | n...c...(... | 2.22045  | 0.56356  | 0.03625  |
| EC0-Cl..1... | -0.69374 | -0.00951 | 2.1299   | P4E0N...0-.. | 0.23731  | 0.12603  | -0.92916 | S3E0O...5... | 0.3595   | -0.64253 | 0.44271  | VS3-C...12.. | 0.51146  | 0.90293  | 2.02354  | n...c.....   | 0.43038  | -0.57753 | 0.20811  |
| EC0-N...1... | 0.49535  | 2.39305  | -0.73961 | P4E0N...1-.. | 0.08173  | 0.23844  | 0.16405  | S3E0O...8... | 0.63217  | 0.35279  | 0.3973   | VS3-C...13.. | 0.34651  | 0.22523  | -0.4953  | n...c...I... | -0.34109 | -0.87386 | 0.02587  |
| EC0-N...2... | -1.33505 | 0.24333  | -0.91065 | P4E0N...3-.. | 0.41488  | 0.24125  | -0.67034 | S3E0o...10-  | 0.35194  | 0.01362  | 0.48288  | VS3-C...14.. | 0.26273  | 2.27114  | 0.2148   | n...c...[... | 0.06773  | 0.30995  | -1.11365 |
| EC0-N...3... | 0.20114  | 0.20743  | -0.74116 | P4E0N...4-.. | 0.12363  | 0.32704  | 0.0151   | PT2-C...1... | 0.42701  | 0.0524   | -0.65202 | VS3-C...15.. | 0.08956  | 4.44813  | -0.72802 | n...c...c... | -0.86836 | 0.38561  | -0.85596 |
| EC0-O...1... | 2.16737  | 0.24589  | 0.27243  | P4E0N...5-.. | 2.75092  | 0.17746  | 2.40364  | PT2-C...2... | 0.79571  | 0.40932  | 0.13916  | VS3-C...16.. | 0.1562   | 1.93097  | 2.52258  | n...o...I... | 0.34037  | 1.6818   | 0.29471  |
| EC0-O...2... | -0.58478 | 0.31241  | -0.89523 | P4E0N...6-.. | 0.03666  | 0.07585  | 0.23984  | PT2-C...3... | 0.30819  | -0.2124  | -1.26186 | VS3-C...17.. | 0.0415   | 0.38754  | 0.56959  | o.....       | 0.1883   | 0.14493  | 0.39791  |
| EC0-o...2... | 0.05332  | 1.437    | 2.00826  | P4E0N...7-.. | 0.33283  | 1.43708  | -0.57169 | PT2-C...4... | 0.03921  | -0.20539 | -0.6328  | VS3-C...18.. | 0.10212  | 0.39728  | 2.1501   | o...I.....   | 0.42723  | 0.33823  | 0.23492  |
| H.....       | 0.43613  | 0.39177  | 0.32187  | P4E0O...1-.. | 0.88848  | -0.47807 | 0.49098  | PT2-C...5... | 0.34853  | 2.18371  | 0.02667  | VS3-C...19.. | 0.66512  | 0.0298   | 0.3163   | o...I...c... | 0.09988  | 0.40471  | 0.32375  |
| H...[...1... | 0.02854  | -0.09255 | 0.16442  | P4E0O...3-.. | 0.4003   | 0.32263  | -0.20275 | PT2-C...6... | 2.12257  | 0.0702   | 0.36238  | VS3-C...3... | 0.19216  | 0.64115  | -0.31479 | o...n.....   | 2.43507  | 0.00673  | 0.32879  |
| H...[...2... | -0.6929  | 0.02092  | 2.03175  | P4E0O...4-.. | -0.81046 | -0.08406 | -1.65002 | PT2-F...2... | -0.45981 | 0.16486  | -0.69537 | VS3-C...4... | 0.07822  | 0.07276  | 2.2225   | o...n...c... | 0.0706   | 0.17053  | 0.40389  |
| Br..(.....   | 0.41058  | -0.76523 | -0.91031 | P4E0O...7-.. | -1.05828 | 0.46426  | 1.93701  | PT2-Br..2... | -0.90091 | -0.46571 | 0.0669   | VS3-C...5... | -0.41519 | 0.08141  | 0.29392  |              |          |          |          |

Table S4. Calculated numerical values for designed molecules physicochemical properties, lipophilicity, water solubility, pharmacokinetics and druglikeness

| Molecule                      | A        | A1       | A2       | A3       | A4       | A5       |
|-------------------------------|----------|----------|----------|----------|----------|----------|
| #Heavy atoms                  | 21       | 22       | 23       | 24       | 22       | 23       |
| #Aromatic heavy atoms         | 12       | 12       | 12       | 12       | 12       | 12       |
| Fraction Csp3                 | 0.33     | 0.37     | 0.4      | 0.43     | 0.37     | 0.37     |
| #Rotatable bonds              | 9        | 9        | 10       | 10       | 9        | 10       |
| #H-bond acceptors             | 3        | 3        | 3        | 3        | 3        | 3        |
| #H-bond donors                | 1        | 1        | 1        | 1        | 1        | 1        |
| MR                            | 85.94    | 90.91    | 95.72    | 100.52   | 90.91    | 98.78    |
| TPSA                          | 30.49    | 30.49    | 30.49    | 30.49    | 30.49    | 30.49    |
| iLOGP                         | 3.58     | 3.96     | 4.16     | 4.31     | 3.92     | 4.13     |
| XLOGP3                        | 3.85     | 4.22     | 4.65     | 4.98     | 4.22     | 4.41     |
| WLOGP                         | 3.43     | 3.74     | 3.99     | 4.56     | 3.74     | 4.18     |
| MLOGP                         | 3.05     | 3.29     | 3.51     | 3.74     | 3.29     | 3.63     |
| Silicos-IT Log P              | 4.13     | 4.65     | 5.05     | 5.28     | 4.65     | 5.2      |
| Consensus Log P               | 3.61     | 3.97     | 4.27     | 4.57     | 3.96     | 4.31     |
| ESOL Log S                    | -3.86    | -4.16    | -4.44    | -4.72    | -4.16    | -4.69    |
| ESOL Solubility (mg/ml)       | 3.91E-02 | 2.05E-02 | 1.14E-02 | 6.27E-03 | 2.05E-02 | 7.73E-03 |
| ESOL Solubility (mol/l)       | 1.37E-04 | 6.85E-05 | 3.64E-05 | 1.92E-05 | 6.85E-05 | 2.04E-05 |
| ESOL Class                    | Soluble  | Moderate | Moderate | Moderate | Moderate | Moderate |
| Ali Log S                     | -4.19    | -4.57    | -5.02    | -5.36    | -4.57    | -4.77    |
| Ali Solubility (mg/ml)        | 1.86E-02 | 8.05E-03 | 3.02E-03 | 1.43E-03 | 8.05E-03 | 6.46E-03 |
| Ali Solubility (mol/l)        | 6.51E-05 | 2.69E-05 | 9.62E-06 | 4.37E-06 | 2.69E-05 | 1.71E-05 |
| Ali Class                     | Moderate | Moderate | Moderate | Moderate | Moderate | Moderate |
| Silicos-IT LogSw              | -6.85    | -7.24    | -7.63    | -7.66    | -7.24    | -8.05    |
| Silicos-IT Solubility (mg/ml) | 4.00E-05 | 1.74E-05 | 7.31E-06 | 7.23E-06 | 1.74E-05 | 3.34E-06 |
| Silicos-IT Solubility (mol/l) | 1.40E-07 | 5.82E-08 | 2.33E-08 | 2.21E-08 | 5.82E-08 | 8.83E-09 |
| Silicos-IT class              | Poorly   | Poorly   | Poorly   | Poorly   | Poorly   | Poorly   |
| GI absorption                 | High     | High     | High     | High     | High     | High     |
| BBB permeant                  | Yes      | Yes      | Yes      | Yes      | Yes      | Yes      |
| Pgp substrate                 | No       | No       | No       | No       | No       | No       |
| CYP1A2 inhibitor              | Yes      | Yes      | Yes      | Yes      | Yes      | Yes      |
| CYP2C19 inhibitor             | Yes      | Yes      | Yes      | Yes      | Yes      | Yes      |
| CYP2C9 inhibitor              | No       | No       | No       | No       | No       | Yes      |
| CYP2D6 inhibitor              | Yes      | Yes      | Yes      | Yes      | Yes      | Yes      |
| CYP3A4 inhibitor              | No       | Yes      | Yes      | Yes      | Yes      | Yes      |
| log Kp (cm/s)                 | -5.31    | -5.13    | -4.91    | -4.76    | -5.13    | -5.48    |
| Lipinski #violations          | 0        | 0        | 0        | 0        | 0        | 0        |
| Ghose #violations             | 0        | 0        | 0        | 0        | 0        | 0        |
| Veber #violations             | 0        | 0        | 0        | 0        | 0        | 0        |

|                       |      |      |      |      |      |      |
|-----------------------|------|------|------|------|------|------|
| Egan #violations      | 0    | 0    | 0    | 0    | 0    | 0    |
| Muegge #violations    | 0    | 0    | 0    | 0    | 0    | 0    |
| Bioavailability Score | 0.55 | 0.55 | 0.55 | 0.55 | 0.55 | 0.55 |

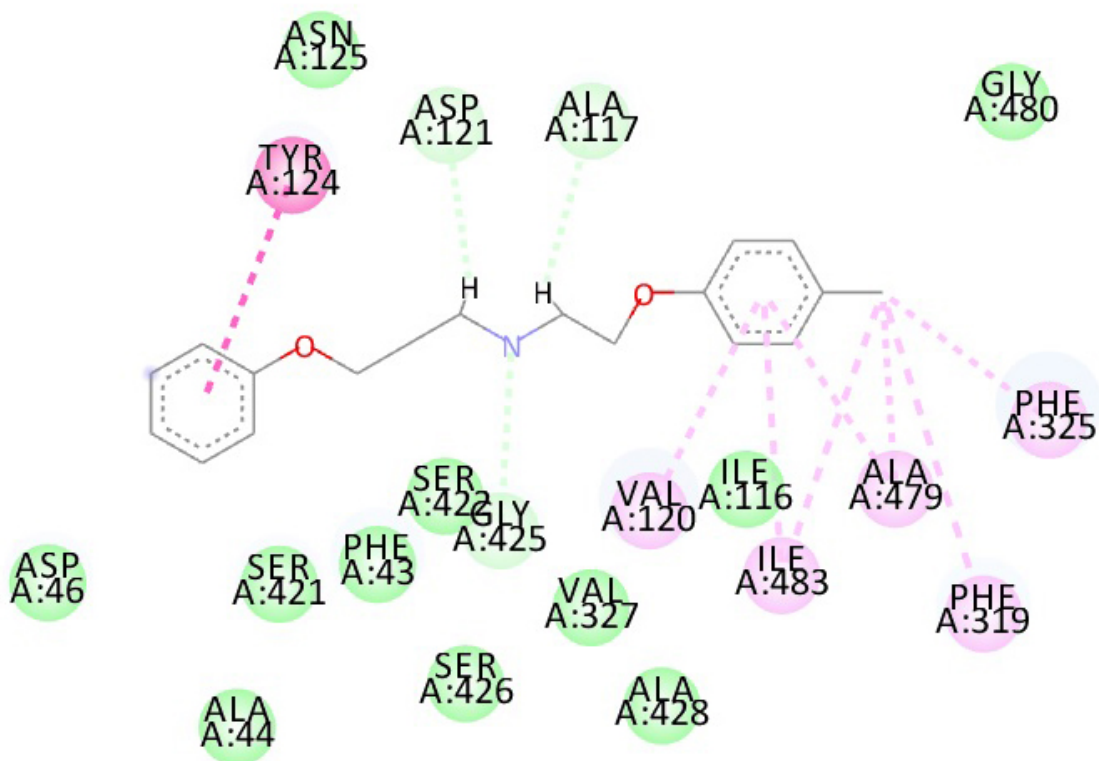

**Interactions**

- |                                                                                                                                                                     |                                                                                                                                                         |
|---------------------------------------------------------------------------------------------------------------------------------------------------------------------|---------------------------------------------------------------------------------------------------------------------------------------------------------|
| <span style="display: inline-block; width: 15px; height: 15px; background-color: #90EE90; border: 1px solid black; margin-right: 5px;"></span> van der Waals        | <span style="display: inline-block; width: 15px; height: 15px; background-color: #FFB6C1; border: 1px solid black; margin-right: 5px;"></span> Alkyl    |
| <span style="display: inline-block; width: 15px; height: 15px; background-color: #90EE90; border: 1px solid black; margin-right: 5px;"></span> Carbon Hydrogen Bond | <span style="display: inline-block; width: 15px; height: 15px; background-color: #DDA0DD; border: 1px solid black; margin-right: 5px;"></span> Pi-Alkyl |
| <span style="display: inline-block; width: 15px; height: 15px; background-color: #FF69B4; border: 1px solid black; margin-right: 5px;"></span> Pi-Pi Stacked        |                                                                                                                                                         |

Figure S4. Two-dimensional representation of the interaction between molecule A and amino acids inside dopamine transporter binding pocket.

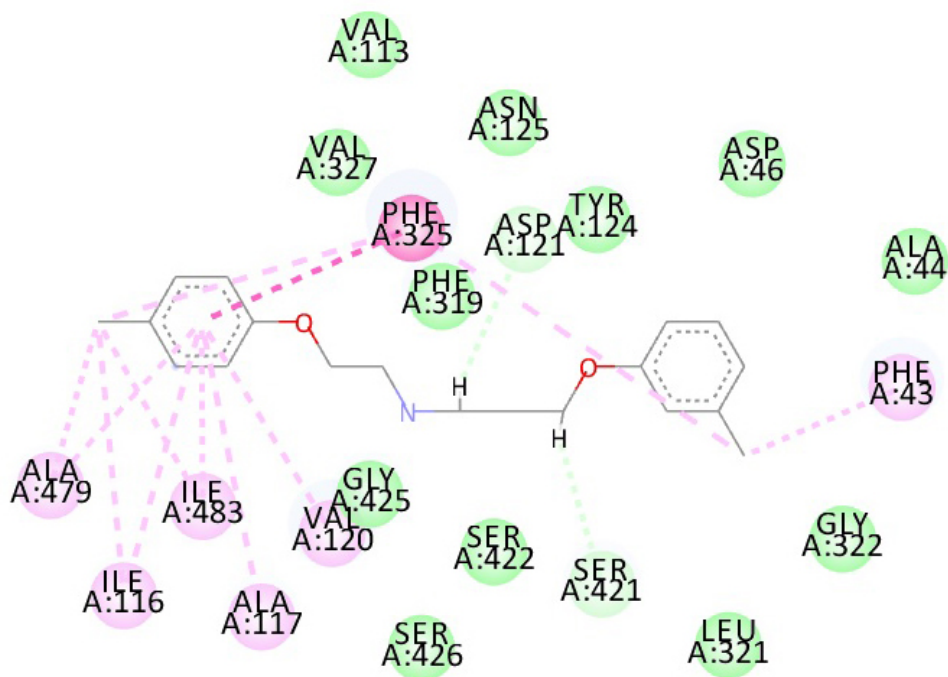

#### Interactions

|                                                                |                                                  |
|----------------------------------------------------------------|--------------------------------------------------|
| <span style="color: green;">■</span> van der Waals             | <span style="color: lightpurple;">■</span> Alkyl |
| <span style="color: lightgreen;">■</span> Carbon Hydrogen Bond | <span style="color: purple;">■</span> Pi-Alkyl   |
| <span style="color: pink;">■</span> Pi-Pi Stacked              |                                                  |

Figure S5. Two-dimensional representation of the interaction between molecule A1 and amino acids inside dopamine transporter binding pocket.



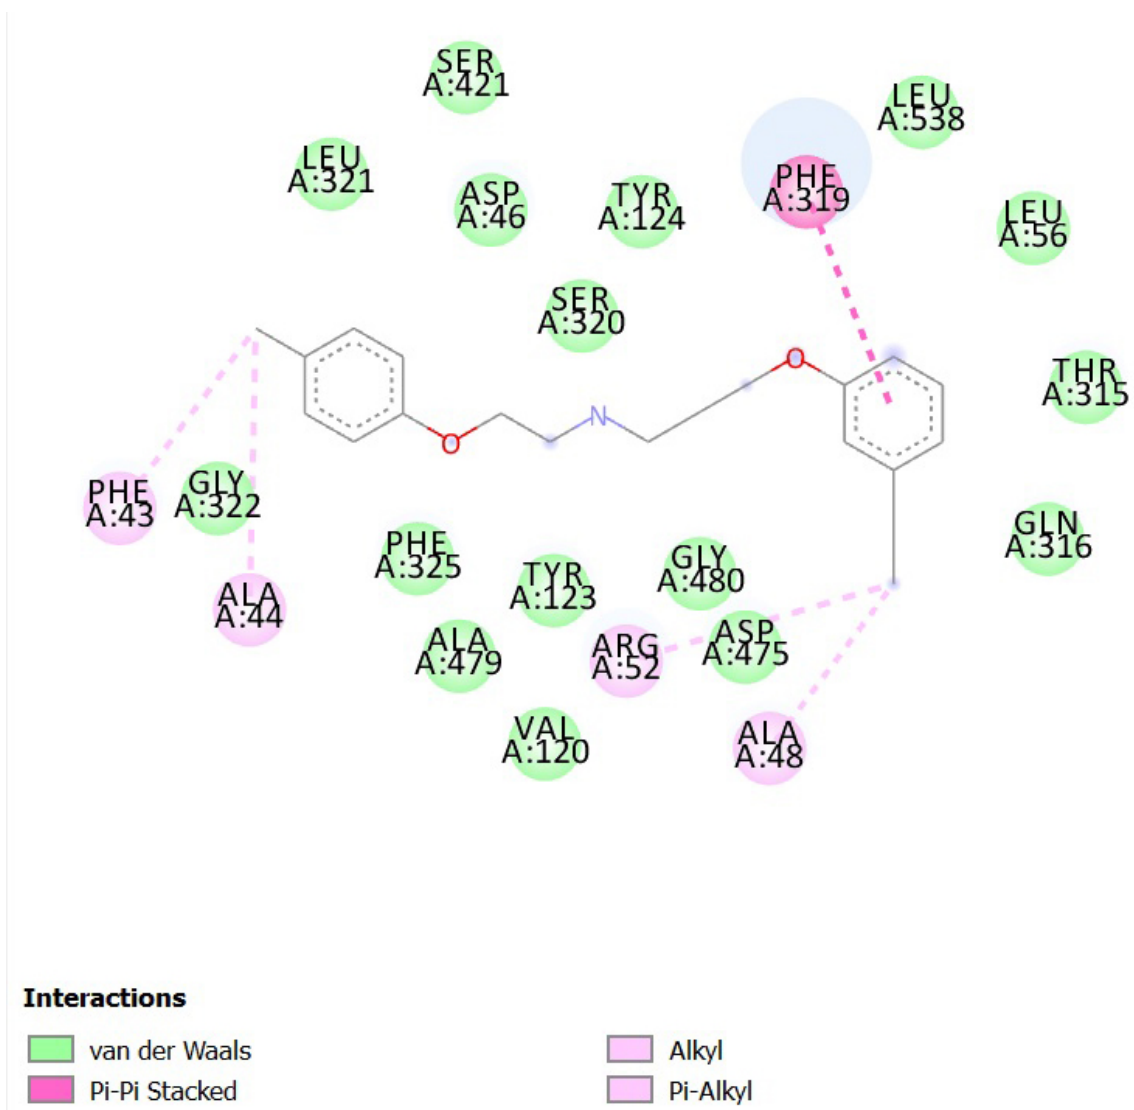

Figure S6. Two-dimensional representation of the interaction between molecule A2 and amino acids inside dopamine transporter binding pocket.

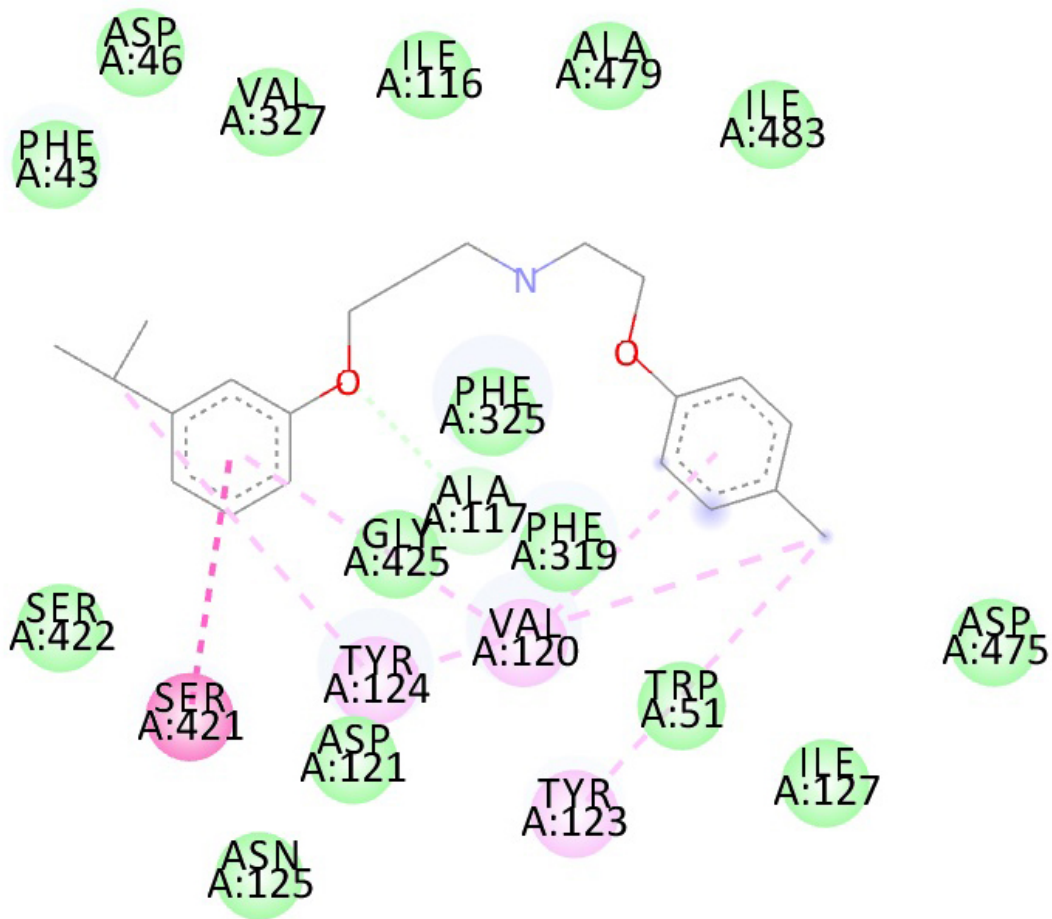

**Interactions**

- |                                                                                                                                                                     |                                                                                                                                                                 |
|---------------------------------------------------------------------------------------------------------------------------------------------------------------------|-----------------------------------------------------------------------------------------------------------------------------------------------------------------|
| <span style="display: inline-block; width: 15px; height: 15px; background-color: #90EE90; border: 1px solid black; margin-right: 5px;"></span> van der Waals        | <span style="display: inline-block; width: 15px; height: 15px; background-color: #FF69B4; border: 1px solid black; margin-right: 5px;"></span> Amide-Pi Stacked |
| <span style="display: inline-block; width: 15px; height: 15px; background-color: #90EE90; border: 1px solid black; margin-right: 5px;"></span> Carbon Hydrogen Bond | <span style="display: inline-block; width: 15px; height: 15px; background-color: #DDA0DD; border: 1px solid black; margin-right: 5px;"></span> Pi-Alkyl         |

Figure S7. Two-dimensional representation of the interaction between molecule A3 and amino acids inside dopamine transporter binding pocket.

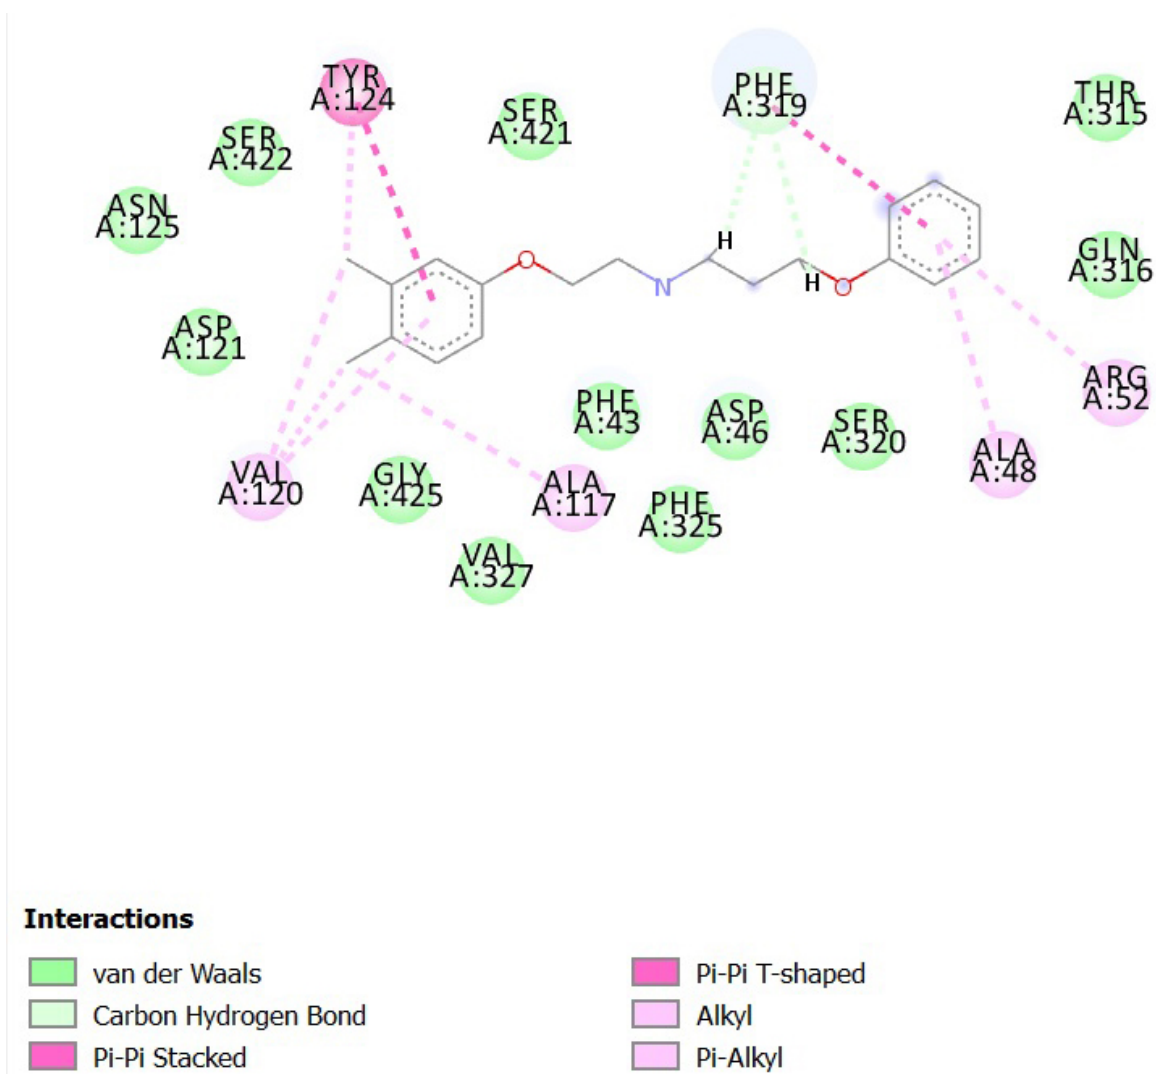

Figure S8. Two-dimensional representation of the interaction between molecule A4 and amino acids inside dopamine transporter binding pocket.

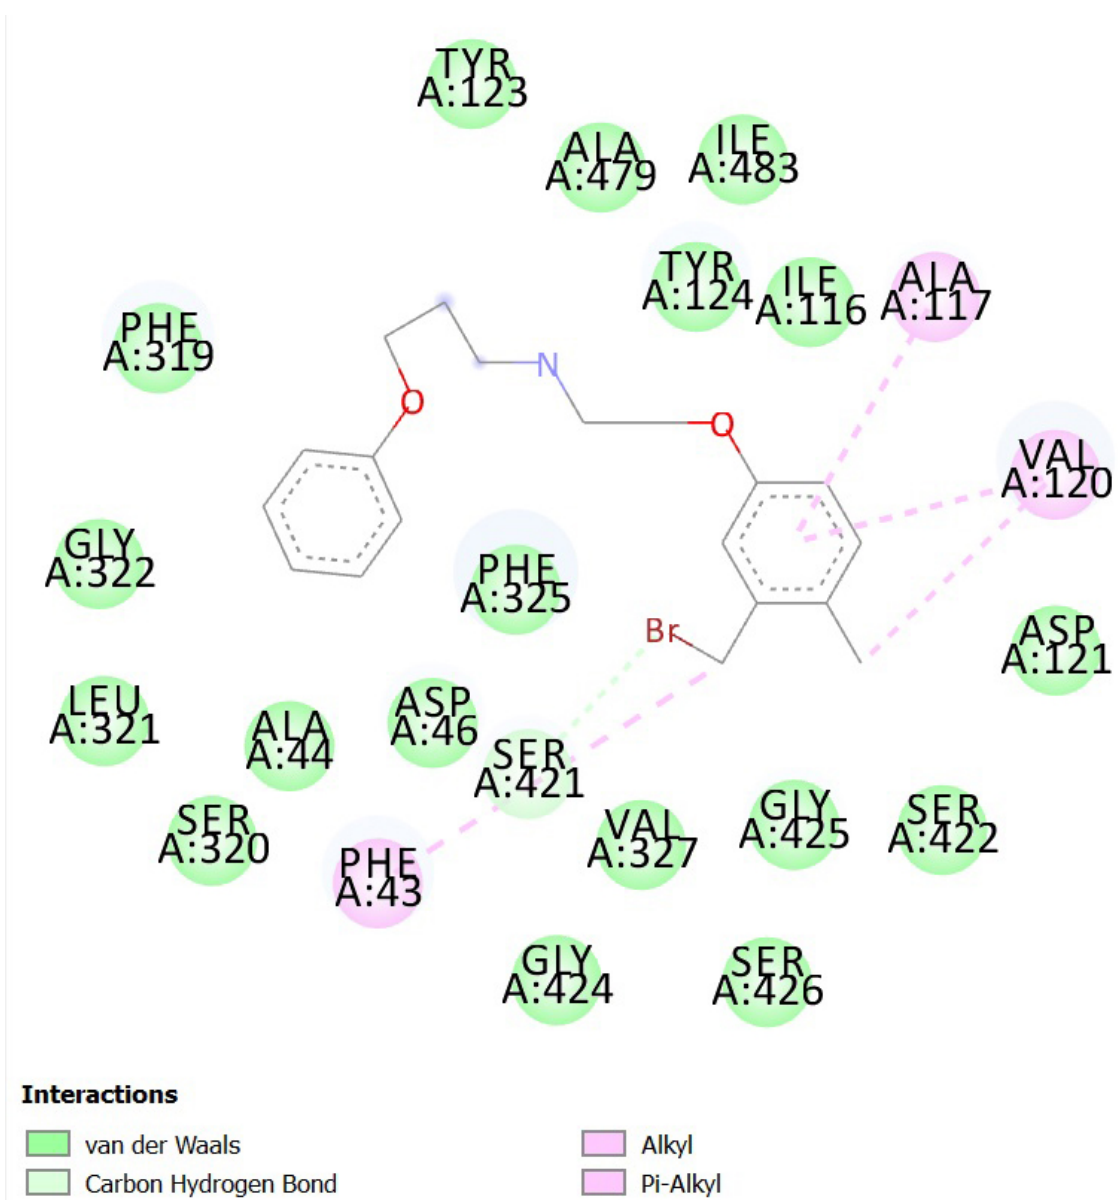

Figure S9. Two-dimensional representation of the interaction between molecule A5 and amino acids inside dopamine transporter binding pocket.
